1 **Fifty generations of amitosis: tracing asymmetric allele segregation in**  
2 **polyploid cells with single-cell DNA sequencing**

3 Valerio Vitali\*, Rebecca Rothering and Francesco Catania

4 Institute for Evolution and Biodiversity, University of Münster, Hüfferstrasse 1, 48149  
5 Münster, Germany

6 **Running title:** Investigating amitosis via single-cell DNA sequencing

7 **Keywords:** Amitosis, single-cell DNA sequencing, developmental variation, copy number  
8 variation, somatic mutations, somatic assortment, polyploidy

9 **\* Corresponding Author:** Valerio Vitali, PhD, Institute for Evolution and Biodiversity,  
10 University of Münster, Hüfferstrasse 1, 48149 Münster, Germany; Email: vitaliv@uni-  
11 muenster.de

## 12 **Abstract**

13           Amitosis is a widespread form of unbalanced nuclear division whose biomedical and  
14 evolutionary significance remain unclear. Traditionally, insights into the genetics of  
15 amitosis are acquired by assessing the rate of phenotypic assortment. The phenotypic  
16 diversification of heterozygous clones during successive cell divisions reveals the random  
17 segregation of alleles to daughter nuclei. Though powerful, this experimental approach  
18 relies on the availability of phenotypic markers. Here, we present an approach that  
19 overcomes the requirement for phenotypic assortment. Leveraging *Paramecium*  
20 *tetraurelia*, a unicellular eukaryote with nuclear dimorphism and a highly polyploid somatic  
21 nucleus, we use single-cell whole-genome sequencing to track the assortment of  
22 developmentally acquired somatic DNA variants. Accounting for genome representation  
23 biases, we measure the effect of amitosis on allele segregation across the first ~50  
24 amitotic divisions post self-fertilization and compare our empirical findings with theoretical  
25 predictions estimated via mathematical modeling. In line with our simulations, we show  
26 that amitosis in *P. tetraurelia* produces measurable but modest levels of somatic  
27 assortment. In forgoing the requirement for phenotypic assortment and employing  
28 developmental, environmentally induced somatic variation as molecular markers, our work  
29 provides a new powerful approach to investigate the consequences of amitosis in polyploid  
30 cells.

## 31 Introduction

32 The commonly held view that mitosis and meiosis are the universal forms of cell  
33 division is incomplete—some cells can also divide without the intervention of the nuclear  
34 spindle following direct nuclear fission, a process known as amitosis.

35 The existence of amitosis has been repeatedly called into question. Many of its  
36 early accounts (e.g. **(Child 1907)**) have been disproved **(Conklin 1917)**, its occurrence  
37 considered a rare exception **(Pfitzer 1980)**, an aberrant or degenerative process  
38 **(Flemming 1891)**, or a form of nuclear division strictly uncoupled from cell proliferation  
39 **(Macklin 1916)** and of uncertain functional significance. Since then, various forms of “true”  
40 amitosis have been documented across eukaryotes including insects **(Lucchetta and**  
41 **Ohlstein 2017; Nakahara 1917)**, plants **(Miller 1980)**, and more tentatively, vertebrates  
42 **(Kuhn, Therman, and Susman 1991; Yiquan and Binkung 1986)**. Most notably, in  
43 ciliates amitosis has evolved into the predominant means of somatic nuclear reproduction  
44 during cell proliferation **(Orias 1991)**.

45 In *Drosophila*, amitosis of polyploid cells in the intestinal epithelium may serve as a  
46 significant mechanism of de-differentiation associated with stem cell replenishment  
47 **(Lucchetta and Ohlstein 2017)**. This mechanism may also initiate cancer through the  
48 formation of aneuploid cells **(Lucchetta and Ohlstein 2017)**. In vertebrates, amitosis may  
49 occur in damaged or cancerous liver cells **(Yiquan and Binkung 1986)**, or in deciduous  
50 tissues with subpopulations of polyploid cells such as the trophoblast **(Kuhn et al. 1991)**.  
51 Polyploidy, achieved through endomitosis or endoreplication **(Fox and Duronio 2013;**

52 **Zielke, Edgar, and DePamphilis 2013**), may promote DNA-damage insensitivity through  
53 various mechanisms in plants, insects and bacteria, and serve as a virulence factor in  
54 pathogenic fungi (**Schoenfelder and Fox 2015**). In addition, mitotic de-polyploidization of  
55 polyploid cells is associated with cell rejuvenation in cancer (**Erenpreisa et al. 2011**), and,  
56 similar to amitosis, can readily generate populations of genetically heterogeneous cells  
57 (aneuploid cells) capable of rapid adaptive evolution (e.g. in response to xenobiotics or  
58 tissue damage (**Duncan et al. 2010, 2012**)). Despite the widespread phylogenetic  
59 distribution of amitosis, its potential role in stem cell differentiation, and cancer onset and  
60 progression, this form of unbalanced nuclear division is severely understudied.

61 Ciliates offer a powerful system for gaining insights into the process of amitosis.  
62 Ciliated protozoans such as *Paramecium tetraurelia* (henceforth *Paramecium*) are  
63 characterized by two functionally specialized nuclei with distinct nuclear architectures (**Lyn**  
64 **2010**). The small diploid germline nucleus, the micronucleus, is transcriptionally silent  
65 during asexual division and harbors the germline genome. In contrast, the larger somatic  
66 nucleus—the macronucleus—is expressed during vegetative growth. Its expression  
67 governs cell physiology and behavior (**Beale and Preer Jr. 2008a**). In *Paramecium*, the  
68 somatic genome is highly polyploid. This high-level ploidy is achieved during the  
69 biogenesis of the macronucleus through an endoreplication process, in which a copy of the  
70 diploid germline genome is used as a template for amplification (from  $2n$  to  $\sim 860n$  (**Allen**  
71 **and Gibson 1972; Woodard, Gelber, and Swift 1961**)).

72 During the vegetative life of *Paramecium*, the diploid micronuclei divide mitotically,  
73 whereas the polyploid somatic nucleus divides amitotically—it elongates and eventually  
74 separates into two daughter macronuclei. Upon amitosis allele segregation is subject to

75 random fluctuations. It is not entirely clear how cells can avoid severe aneuploid  
76 imbalances over prolonged vegetative division (**Preer and Preer 1979**). This is especially  
77 true for the ciliate *Tetrahymena*, which has a much lower ploidy than *Paramecium* (~45n  
78 (**Doerder, Deak, and Lief 1992; Eisen et al. 2006; Hamilton et al. 2016; Orias and**  
79 **Flacks 1975**)). Although not necessarily sufficient to maintain constant ploidy levels across  
80 the genome, there is evidence that in *Paramecium* the total macronuclear DNA content is  
81 tightly regulated across divisions (**Berger and Schmidt 1978**). This hints at the existence  
82 of a compensatory “replicative control” mechanism that may occur at the individual  
83 chromosome level (**Beale and Preer Jr. 2008b; Preer and Preer 1979**). Such a  
84 mechanism would prevent aneuploid imbalance (deviations from the original ploidy) or  
85 even complete chromosomal loss (so called *nullisomics*, where both alleles are lost).  
86 Alternatively, as suggested by a more recent study on the ciliate *Chilodonella uncinata*,  
87 balancing selection may be sufficient to maintain a stable ploidy during asexual  
88 reproduction (**Spring, Pham, and Zufall 2013**).

89         Due to the random assortment of genetic elements during amitosis of the  
90 macronucleus (henceforth *somatic assortment*), a biallelic locus eventually becomes fully  
91 homozygous for either of the alternative alleles. The rate at which this loss of  
92 heterozygosity occurs is primarily determined by the number (ploidy) and nature of the  
93 segregating units and the input ratio, *i.e.*, the relative proportion of the two somatic alleles  
94 at the beginning of the clonal cycle (**Bell 2009; Doerder et al. 1992; Merriam and Bruns**  
95 **1988**). Because ciliates’ macronuclei determine the cell phenotype, *somatic assortment* at  
96 heterozygous loci may give rise to *phenotypic assortment*—heterozygous clones  
97 eventually segregate into homozygous sub-clones stably expressing one of the two  
98 parental alleles (**Doerder et al. 1992; Merriam and Bruns 1988; Nanney and Preparata**

99 **1979; Orias and Flacks 1975)**. *Phenotypic assortment* has been the primary tool for  
100 investigating *somatic assortment* and has greatly helped understand the nature of amitosis  
101 in ciliates such as *Tetrahymena* (**Doerder et al. 1992**). However, a simple and direct  
102 approach that helps illuminate the process of amitosis that does not rely on phenotypic  
103 traits is currently lacking. Such an approach would conveniently allow researchers to  
104 investigate amitosis even in the absence of genetic markers that encode easily observable  
105 traits.

106         Recent findings concerning the process of soma development in *Paramecium* open  
107 a new perspective on how amitosis can be studied. Like other ciliates, the polyploid  
108 somatic genome of *Paramecium* is an extensively processed version of the germline  
109 genome, largely deprived of a considerable portion of DNA via a developmental process  
110 called Programmed DNA Elimination (PDE). In addition to removing transposons and other  
111 repetitive DNA elements, PDE removes tens of thousands of intervening, typically short  
112 (<150bp) and AT-rich germline DNA elements termed Internal Eliminated Sequences  
113 (IESs) (**Arnaiz et al. 2012; Beale and Preer Jr. 2008a; Duharcourt and Betermier 2014;**  
114 **Guérin et al. 2017**). Although IESs are, for the most part, perfectly removed from the  
115 newly developed somatic genome, some are incompletely excised—in the order of a few  
116 hundreds at standard cultivation conditions (**Vitali, Hagen, and Catania 2019**). These  
117 retained elements, which we termed somatic IESs, interrupt a variable fraction (henceforth  
118 retention levels) of the total number of macronuclear DNA copies (**Arnaiz et al. 2012;**  
119 **Catania et al. 2013; Duret et al. 2008; Hagen, Vitali, and Catania 2020; Vitali et al.**  
120 **2019**). The retention levels of somatic IESs provide a measurable molecular marker to  
121 assess the random assortment of segregating alleles in *Paramecium*. More explicitly, by  
122 recording the retention levels of somatic IESs across subsequent amitotic cycles (*i.e.*,

123 asexual generations), it should be possible to directly test the extent to which amitosis  
124 impacts the segregation of somatic alleles.

125         Single-cell sequencing technology (scDNA-seq) is a potentially powerful approach  
126 to test this idea. The reliable detection of amitosis-associated changes in allele frequencies  
127 necessitates deep and comprehensive genome coverage as well as sensitivity and  
128 faithfulness. After individual cell isolation, scDNA-seq protocols invariably involve a step of  
129 extensive whole genome amplification (WGA) followed by library construction and next  
130 generation sequencing of the amplification products. Depending on the specific  
131 amplification technology and application, the WGA step can produce a satisfactory  
132 representation of the target genome (**Huang et al. 2015; Pinard et al. 2006**). However,  
133 WGA may also result in amplification artifacts, such as overrepresentation of large  
134 templates (**Maurer-Alcalá, Knight, and Katz 2018; Sabina and Leamon 2015**), reduced  
135 genome coverage (**Börgstrom et al. 2017**), misrepresentation of copy number variants  
136 under certain conditions (**Van Der Plaetsen et al. 2017**) (but see ((**Deleye et al. 2017**))),  
137 poor scaffold assembly (**de Bourcy et al. 2014**), and allele dropout (**Luquette et al. 2019**).  
138 Current commercially available kits for non-PCR based single-cell WGA minimize  
139 amplification artifacts through a highly optimized isothermal Multiple Displacement  
140 Amplification (MDA) reaction (**Meier et al. n.d.; Pinard et al. 2006**). Although MDA-based  
141 WGA is far more resilient to genome representation biases compared to thermocycling  
142 methods (**Lasken and Egholm 2003**), it may preferentially amplify GC-rich regions  
143 (**Sabina and Leamon 2015**) and lead to an underrepresentation of AT-rich regions (e.g.  
144 *Paramecium*'s IESs). This “selection bias” is anticipated to reach concerning levels in  
145 organisms whose genome composition lies at the low end of the GC-spectrum, such as  
146 fungi, amoebas, apicomplexans, and ciliates (**Videvall 2018**). Potential caveats aside,

147 scDNA-seq could be a powerful tool to trace stochastic evolution in amitotically-dividing  
148 cells.

149           Here we leverage the advantages, and probe the limits of, scDNA-seq to investigate  
150 the assortment of somatic IESs in individual *Paramecium* cells across successive amitotic  
151 divisions. In addition, we develop a freely available software, which simulates the random  
152 segregation of genetic elements across amitotic divisions (**Vitali, Hagen, and Catania**  
153 **2021**), and determine the theoretical rate of somatic assortment in *Paramecium*. By  
154 comparing empirical data with simulation-based predictions, we find that amitosis-  
155 associated changes in allele frequencies in *Paramecium* deviate modestly from what is  
156 expected under random assortment. Collectively, we show that single-cell whole genome  
157 sequencing and dedicated bioinformatic analyses allow accurate tracing of amitotic allele  
158 segregation in proliferating polyploid cells.



## 159 **Results**

### 160 **Single-cell DNA sequencing of the *Paramecium* somatic genome**

161 scDNA-seq should facilitate direct measurements of the fraction of segregating  
162 alleles in individual somatic nuclei of asexually reproducing cells. Among the available  
163 scDNA-seq options, the Multiple Displacement Amplification (MDA)-based methods  
164 generate the highest amplification yield and most complete genome coverage while  
165 introducing minimal bias relative to other amplification methods (**Lasken and Egholm**  
166 **2003; Meier et al. n.d.; Pinard et al. 2006**). However, how extensively genomes or  
167 genomic regions with particularly low GC content—such as the somatic DNA of  
168 *Paramecium* (28% on average)—prove refractory to MDA has not yet been ascertained to  
169 our knowledge.

170 To assess the quality of the scDNA-seq data in terms of somatic genome  
171 representation and coverage, we compared a total of 11 scDNA samples to a mass culture  
172 sample (mcDNA) obtained from the parental population used to set up the single-cell  
173 experiment. Additionally, we included a computer-generated DNA-seq sample (artificial  
174 DNA, aDNA) produced from *P. tetraurelia*'s reference (somatic) genome to serve as bias-  
175 free reference.

176 All scDNA-seq samples examined show a moderate underrepresentation of AT-rich  
177 sequences (**Figure 1A**). In contrast, both the mcDNA-seq and aDNA-seq show virtually  
178 homogeneous coverage across the whole range of GC-content found in the *Paramecium*

179 genome. Furthermore, sequencing depth in the scDNA-seq samples increases with the  
180 distance from scaffold ends (**Figure 1B**). This observation suggests that there is a  
181 substantial reduction of amplification efficiency of the MDA reaction at the chromosome  
182 termini. A quantitative analysis of genome representation confirms that scDNA samples  
183 suffer from moderate to intermediate *GC Bias*, *i.e.*, the underrepresentation of AT-rich  
184 regions, and severe *Terminal Bias*, *i.e.*, the underrepresentation of chromosome termini  
185 (**Table 1**).

## 186 **Detection of AT-rich germline sequences in the *Paramecium* somatic genome**

187 Somatic IESs may be viewed as AT-rich insertions that occur naturally in  
188 *Paramecium* following somatic genome development (**Arnaiz et al. 2012; Catania et al.**  
189 **2013; Duret et al. 2008; Hagen et al. 2020; Vitali et al. 2019**). Detection of these somatic  
190 IESs requires pervasive and deep genome coverage as mutant alleles (IES<sup>+</sup>) are scattered  
191 across the genome and can be retained in a variable fraction of the polyploid somatic  
192 nucleus, coexisting with their wild-type alleles (IES<sup>-</sup>). To determine whether the uncovered  
193 biases of scDNA-seq (**Figure 1 and Table 1**) limit our ability to detect somatic IESs, we  
194 compared the somatic genomes obtained from mass culture and single cells. It is worth  
195 noting that, unlike scDNA, conventional mcDNA (bulk) sequencing does not capture the  
196 genetic heterogeneity of single cells, and for a given locus provides a population-average  
197 estimate of the fraction of target somatic alleles.

198 Relative to the reference mcDNA, scDNA samples with a similar number of mapped  
199 reads (scDNA\_1x) exhibit higher levels of IES dropout (*i.e.*, poor or no coverage of IES-

200 flanking macronuclear regions) due to uneven genome representation (**Table 2**). However,  
201 this effect is ameliorated by increased sequencing depth (**Figure 2A**), and scDNA samples  
202 with approximately double the amount of mapped reads (scDNA\_2x) show IES dropout  
203 levels comparable to those of the reference mcDNA (**Table 2**). When we account for the  
204 level of total IES dropout, the number of somatic IESs inferred for the scDNA samples  
205 approaches the number of somatic IESs detected in the reference mcDNA sample (**Figure**  
206 **2B**). Last, we tested whether IES retention levels, as measured through the IES Retention  
207 Score (IRS, see Methods), are underestimated in scDNA samples as compared to the  
208 mcDNA sample. Despite the elevated AT content of IESs and the detected GC bias  
209 associated with single-cell DNA sequencing, we don't find evidence for preferential dropout  
210 of the mutant allele (IES<sup>+</sup>) (**Additional File 1: Figure S1**). Overall, we show that MDA-  
211 based scDNA-seq, when applied to an AT-rich genome such as that of *Paramecium* can  
212 yield comprehensive genome coverage as long as sequencing depth is sufficiently large,  
213 ideally >2 fold compared to mass culture sequencing (**Additional File 1: Table S1**).

#### 214 **IES retention levels across the first ~50 amitotic divisions post self-fertilization**

215       Having assessed the quality of the scDNA-seq data and learned how to mitigate the  
216 impact of scDNA-seq biases, we examined progressively aging *Paramecium* lines and  
217 estimated IES retention scores (IRSs) for cells collected on Day 5 (4 replicates), Day 10 (4  
218 replicates) and Day 14 (3 replicates). These cells had undergone, respectively, ~17, ~35  
219 and ~49 divisions after the last self-fertilization. We focused on a set of highly covered IES  
220 loci ( $N=75$ ) for which we could accurately estimate the corresponding retention levels. We  
221 asked: how do the empirical IRS values change over time?

222 We compared the changes in the standard deviation for the empirical IRS values  
223 (observed  $SD_{IRS}$ ), and their ratios ( $SDR_{IRS}$ ) across time points (**Additional File 1: Figure**  
224 **S2**) We find a significant up-shift in the  $SD_{IRS}$  distribution over time (**Additional File 1:**  
225 **Figure S2A**) when comparing the two points furthest apart in the time course (Wilcoxon  
226 signed rank test, D14 vs. D5,  $P = 0.037$ , effect size  $r = 0.282$  (small),  $N = 75$ ). When  
227 considering the standard deviation ratios ( $SDR_{IRS}$ ) computed pairwise between time points,  
228 the difference is only slightly above the significance threshold (Wilcoxon signed rank test,  
229 D14 / D5 vs. D10 / D5,  $P = 0.062$ , effect size  $r = 0.199$  (small),  $N = 60$ ), although the  
230 density plots show a clear up-shift in the distribution over time (median D14 / D5  $SDR_{IRS} =$   
231 1.25) (**Additional File 1: Figure S2B**). We also report the summary statistics for the  
232 observed and predicted IRS standard deviations (**Additional File 1: Table S2**). Taken  
233 together, our empirical findings suggest a slight increase in variation of IES retention levels  
234 across amitotic cell divisions.

## 235 **Simulation of somatic assortment**

236 Multiple models of macronuclear architecture in ciliates have been proposed to  
237 account for observed rates of phenotypic assortment, the relative difference in DNA  
238 content between micro- and macronuclei, the absence of visible mitosis, and the  
239 avoidance of aneuploid imbalance. However, most if not all models proposed so far suffer  
240 from some sort of limitations (**Bell 2009; Nanney and Preparata 1979; Preer and Preer**  
241 **1979**). Three fundamental macronuclear configuration models (alongside their  
242 implications) are described in **Figure 3**. Briefly, the *chromosomal model* assumes that  
243 individual somatic chromosomes segregate independently from each other at cell division

244 **(Figure 3A)**, whereas the *diploid model* posits that homologous chromosomes (or set of  
245 chromosomes) are bundled into diploid sub-units **(Figure 3B)**. Finally, the *whole-genome*  
246 *haploid sub-unit model* (hereafter the *haploid model*) hypothesizes that full sets of  
247 chromosomes from either one of the parental haplotypes are held together into larger  
248 segregating sub-units **(Figure 3C)**. Provided that *Paramecium* avoids aneuploid imbalance  
249 at all loci, regardless of the mechanism **(Beale and Preer Jr. 2008a; Bell 2009; Berger**  
250 **and Schmidt 1978; Preer and Preer 1979)**, both the *chromosomal* and *haploid* models  
251 predict that for a somatic locus that retains an IES after Programmed DNA Elimination, the  
252 fraction of IES<sup>+</sup> copies (mutant allele) will tend towards either 1 (IES Retention Score [IRS]  
253 = 1, only IES<sup>+</sup> copies) or 0 (IRS = 0, only IES<sup>-</sup> copies) as cells continue to divide asexually.  
254 But how rapidly would this loss of heterozygosity occur? To the best of our knowledge,  
255 while a thorough quantitative exploration of somatic assortment for *Paramecium* was  
256 published >40 years ago **(Preer 1976)**, direct evidence that the individual segregating  
257 subunits are somatic chromosomes (germline chromosome fragments) is currently lacking  
258 **(Nyberg 1976; Preer 1976)**.

259 We first used mathematical modeling to determine how the fraction of mutant alleles  
260 (IES<sup>+</sup> copies) in the somatic nuclei is expected to change across successive amitotic  
261 divisions at individual IES loci. We simulated somatic assortment using the *haploid* and  
262 *chromosomal* models published by John Preer Jr. in 1976 **(Preer 1976)**. We used similar  
263 parameters, except for the number of somatic chromosomes, which was then assumed to  
264 be ~43 **(Preer 1976)**, that we now know to be much larger due to chromosome  
265 fragmentation during DNA elimination. We set this parameter to 115, as there are 115  
266 telomere-capped chromosomes in *Paramecium*'s genome annotation (but its number could  
267 be much larger, as 697 scaffolds larger than 2 kb were assembled) **(Aury et al. 2006)**. Our

268 predicted values strongly correspond with those published by Preer, with only a slight  
269 discrepancy when running the simulation with the *chromosomal model* (**Additional File 1:**  
270 **Table S3**). To further validate our mathematical predictions we modeled somatic  
271 assortment for mass culture and daily re-isolation through bioinformatic simulations (see  
272 Methods). Mathematical and bioinformatics modeling have identical outcome (**Additional**  
273 **File 1: Figure S3**). The allele frequency variance for a small number of daily re-isolated  
274 lines follows a stochastic trend across generations. However, the average run for a large  
275 number of isolation cultures converges on the mathematical / mass culture predictions  
276 (**Additional File 1: Figure S3**). We provide new equations to calculate the standard  
277 deviation of allele frequency distributions (e.g. retention levels) and the rate of somatic  
278 assortment ( $d\sigma/dt$ ) as a function of the number of asexual divisions and starting retention  
279 levels (Methods, equation (5-6)).

280 As expected, the simulation predicts an increase in variability of the copy number  
281 distribution of alleles (e.g. IES<sup>+</sup> / IES<sup>-</sup> copies) across generations (**Figure 4A**). The rate of  
282 somatic assortment is predicted to peak at an input ratio of 0.5 (starting retention level,  
283  $IRS_0 = 0.5$ ), and decrease symmetrically around this value (**Figure 4B**). But how long  
284 would it take for the cells to experience a substantial loss of heterozygosity as a  
285 consequence of the random segregation of alleles at cell division? The simulation predicts  
286 that with a starting retention level ( $IRS_0$ ) of 0.5, after 200 asexual divisions (which  
287 corresponds roughly to a full clonal cycle of *Paramecium*), all cells would still be in the  
288 heterozygous state (IES<sup>+</sup> and IES<sup>-</sup> copies co-existing in the same nucleus) (**Figure 4A,**  
289 **red line and Figure 4C, inset**). In fact, somatic assortment of IES<sup>+</sup> and IES<sup>-</sup> alleles would  
290 only lead to a substantial loss of heterozygosity (e.g.  $H \ll 0.5$ ) after thousands of asexual  
291 generations (**Figure 4C**). Furthermore, even when starting from  $IRS_0 = 0.1$  (or 0.9) the

292 probability that an IES locus becomes fully homozygous after 200 divisions is smaller than  
293 0.20 (**Figure 4C, inset, and Figure 4D**). In sum, our simulations predict that IES retention  
294 levels remain fairly stable during asexual division.

295         Could somatic assortment give rise to phenotypic assortment in *Paramecium*? To  
296 address this question, we calculated the fraction of heterozygous cells that after 200  
297 generations would undergo a “phenotypic switch” due to somatic assortment of IESs (e.g.  
298 IES-bearing gene with  $IRS_0 = 0.5$ ). Assuming an incomplete dominance scenario, wherein  
299 gene inactivation occurs when the fraction of IES<sup>+</sup> copies exceeds 0.85 of the ploidy, only  
300 ~1.4% of the cells (~6.4% for the chromosomal model) would express the phenotype after  
301 200 divisions (cumulative fraction of cells with  $IRS \geq 0.85$  after 200 generations). This  
302 fraction becomes smaller when we consider a larger number of assorting somatic  
303 chromosomes. It should be emphasized, that the computations reported above refer to  
304 single loci. The probability of observing phenotypic assortment increases when considering  
305 multiple heterozygous loci simultaneously (roughly estimated by  $1-(1-p)^n$ ,  $n$ =number of  
306 loci, (**Preer 1976**)).

307         The results of our simulations are consistent with previous indications that somatic  
308 assortment in *P. tetraurelia* proceeds rather slowly (**Preer 1976**). As a consequence,  
309 phenotypic assortment is unlikely to be observed within a single clonal cycle (**Nyberg**  
310 **1976; Preer 1976**), unless cells exhibit high levels of heterozygosity, which are not  
311 characteristic of this self-fertilizing species (**Nanney 1980**) with low nucleotide diversity  
312 (**Catania et al. 2009; Johri et al. 2017**).

313 **Somatic assortment in *Paramecium*: comparing theoretical and empirical**  
314 **observations**

315 Finally, we compared the experimental dispersion of IES retention levels measured  
316 empirically ten (D10) and fourteen (D14) days post self-fertilization with that predicted *in*  
317 *silico*. For the simulations we adopted two models of macronuclear architecture, the  
318 *haploid* and the *chromosomal* model, which predict slightly different rates of somatic  
319 assortment (see Methods for details and **Figure 3**). We find that on Day 14, the  
320 experimental IRS values for a “track set” of highly covered IES loci (n=75; x3 replicates)  
321 are slightly more variable than expected, regardless of the model adopted (**Figure 5A and**  
322 **Figure 5B**). Namely, 87% (195/225) and ~90% (202/225) of the empirical IRS values fall  
323 within the 95% confidence interval (CI95) predicted by the haploid and chromosomal  
324 model, respectively. We find a similar discrepancy between observed and predicted values  
325 on Day 10 (**Additional File 1: Figure S4A and Figure S4B**).

326 We further investigated the relationship between the relative dispersion of retention  
327 levels (coefficient of variation, CV) and the starting retention levels ( $IRS_0$ ), both for our  
328 empirical IRS measurements and the simulated values (**Figure 5C**). The simulations  
329 predict a progressive reduction of the coefficient of variation of IES retention levels ( $CV =$   
330  $SD / IRS_0$ ) with increasing starting retention levels ( $IRS_0$ ) (**Figure 5C**). We find that the  
331 empirical retention levels measured experimentally 14 days post self-fertilization follow the  
332 same pattern, consistent with random assortment of alleles (**Figure 5C**). The observed  
333 variability in the empirical IES retention levels could result entirely from the experimental  
334 error of the IRS measurements. To test this hypothesis, we quantified the random error of  
335 the empirical estimates of IES retention levels (see Methods). We find that although the



336 relative error of the IES retention levels measured experimentally shows a similar  
337 reduction with increasing retention levels, this alone cannot explain the observed variation  
338 in the empirical IRS estimates (**Figure 5C, Figure 5D and Additional File 1: Figure S5**).  
339 More specifically, the observed IRS variation measured 14 days post self-fertilization (gen  
340 = 49,  $N = 75$ ) is significantly greater than that from the random error (Wilcoxon rank sum  
341 test,  $P = 2.4e-06$ , effect size  $r = 0.132$  (small), **Figure 5D**). This is consistent with a  
342 biological variation of IES retention levels across asexual divisions (as opposed to an  
343 experimental artifact).

## 344 Discussion

345 The study of asexual reproduction in ciliates can provide valuable insights into the  
346 evolutionary significance of amitosis. For one, the differentiation of genetically identical  
347 heterozygous cells during cell division provides a source of phenotypic plasticity that could  
348 facilitate environmental adaptation. For another, selection on somatic assortment could  
349 reduce the burden of deleterious germline mutations by preferentially expanding wild type  
350 alleles at the expense of the mutated variants (**Zufall et al. 2006**). As suggested recently,  
351 by increasing the fitness variance (boosting selection) in large populations and at the same  
352 time dampening the drift load in small populations (Muller's ratchet), amitosis may even  
353 confer "the benefits of sex in the absence of sex" (**Zhang et al. 2019**).

354 Here, we studied amitosis and somatic assortment in *Paramecium*, a ciliate that  
355 houses ~860 genome copies in its somatic nucleus (**Allen and Gibson 1972; Woodard et**  
356 **al. 1961**). Following DNA replication, chromatin sub-units in ciliates are assumed to  
357 segregate randomly during amitosis (**Bell 2009; Nanney and Preparata 1979; Orias and**  
358 **Flacks 1975; Preer 1976**). This implies that the nuclear frequency of an allele in  
359 heterozygous clones will change over successive asexual divisions due to stochastic  
360 segregation, ultimately resulting in the production of homozygous lines with different  
361 phenotypes (*phenotypic assortment*). While there is unequivocal evidence of *phenotypic*  
362 *assortment* in *Tetrahymena* (**Doerder et al. 1992; Merriam and Bruns 1988; Nanney and**  
363 **Preparata 1979; Orias and Flacks 1975**), the existence of this phenomenon in  
364 *Paramecium* is doubtful. In fact, previous experimental evidence argues against its  
365 occurrence. In one example, by means of repeated macronuclear regeneration in

366 heterozygous clones of *P. aurelia*, Sonneborn was unable to produce phenotypic  
367 assortment and suggested that the segregating sub-units be in fact diploid (which is  
368 incompatible with assortment) (**Nyberg 1976; Preer 1976; Sonneborn 1947**). In another,  
369 Nyberg used a copper resistance gene as quantitative trait in *P. tetraurelia* and failed to  
370 produce evidence for assortment of copper tolerance throughout ~250 divisions (**Nyberg**  
371 **1976**), consistent with Sonneborn's findings. However, Preer and Nyberg cautioned that  
372 higher ploidy levels (>>860n) would still be compatible with random segregation of  
373 individual somatic chromosomes (**Nyberg 1976; Preer 1976**). Re-examining the impact  
374 that amitosis may have on the somatic variability of *Paramecium* is relevant and  
375 particularly timely as it is now clear that potentially heritable somatic variability in  
376 *Paramecium* can spark from a fully homozygous state as a consequence of incomplete  
377 excision of germline DNA sequences (**Hagen et al. 2020; Vitali et al. 2019**).

378         We first explored the extent to which Multiple Displacement Amplification (MDA)  
379 coupled with DNA sequencing (which we refer to as scDNA-seq) can be used to faithfully  
380 represent the genome of single *Paramecium* cells. To this end, we leveraged whole  
381 genome sequencing data from mass culture (bulk DNA-seq) and single *Paramecium* cells  
382 obtained from the same clone. We then used scDNA-seq to investigate somatic  
383 assortment. We find that scDNA-seq of *Paramecium* AT-rich genomes is affected by mild  
384 to moderate positive GC bias (**Figure 1A and Table 1, left**). We also uncover a severe  
385 representation drop-off near chromosome ends (**Figure 1B and Table 1, right**), consistent  
386 with the inefficient amplification of template termini in MDA reactions catalyzed by the  $\phi 29$   
387 DNA polymerase (**Lage et al. 2003; Sabina and Leamon 2015**). This terminal  
388 representation bias could be leveraged to determine the reproducible fragmentation  
389 patterns of ciliates' chromosomes, and/or complement information from telomeric repeats

390 to confirm full-length chromosomes in genome assemblies. In this context, the preferential  
391 amplification of large DNA templates in MDA reactions was successfully exploited to  
392 preferentially amplify the germline genome of ciliates with highly fragmented somatic DNA  
393 **(Maurer-Alcalá et al. 2018)**. Finally, we show that these genome representation biases  
394 may result in the underestimation of the number of somatic IESs (due to IES dropout).  
395 However, this effect can be ameliorated by increasing sequencing depth **(Table 2, Figure**  
396 **2 and Additional File 1: Table S1)**.

397         Taking the caveats of scDNA-seq into account, we next assessed the feasibility of  
398 tracking somatic assortment of mutant (IES<sup>+</sup>) and wild type (IES<sup>-</sup>) alleles across ~50  
399 asexual generations in single *Paramecium* cells. We tested the degree to which IES  
400 retention levels of a “track set” of 75 highly covered loci diverge after 17 and 31 amitotic  
401 divisions due to somatic assortment. Our experimental estimates are consistent with a  
402 progressive, albeit slow, drift in the fraction of IES<sup>+</sup> alleles in the nuclei **(Figure 5)**. The  
403 moderate impact on allele segregation after ~50 asexual divisions post-fertilization  
404 suggests that IESs retention levels are largely sculpted during Programmed DNA  
405 Elimination and that amitosis is unlikely to significantly affect allele frequency within a  
406 single clonal cycle, at least under the tested conditions, where the power of drift is  
407 maximized. Our empirical findings overlap with theoretical expectations based on  
408 previously proposed somatic assortment models **(Figure 3)**, which we revisit, reproduce  
409 **(Additional File 1: Table S3)**, and update **(Figure 4)**.

410         Although our empirical observations are compatible with the random segregation of  
411 individual chromosome fragments during amitosis **(Figure 5)**, at least part of the observed  
412 variability of the empirical IES retention levels could result from sources other than somatic

413 assortment, including the measurement errors of retention levels (**Figure 5C and Figure**  
414 **S5**) and the progressive fragmentation of somatic chromosomes during clonal senescence  
415 (**Gilley and Blackburn 1994**). Thus, conclusive evidence for the occurrence of somatic  
416 assortment in *Paramecium* awaits further experimentation. We anticipate that future  
417 experiments to investigate allele segregation in amitotically dividing cells will greatly benefit  
418 from the use of scDNA-seq.

419 In conclusion, we show that single-cell whole-genome sequencing can be  
420 successfully used to gain insights into the evolution and structure of AT-rich genomes,  
421 provided that the inherent amplification biases of multiple displacement amplification are  
422 accounted for. Our study provides a powerful new approach to directly and accurately  
423 trace allele segregation in polyploid cells.

## 424 **Materials and Methods**

### 425 **Experiment outline**

426           A single cell of *Paramecium tetraurelia* strain d12 derived from self-fertilization was  
427 expanded to a 5 ml mass culture and used as clonal parental population to set up the  
428 experiment. The somatic genome of the parental population was purified and sequenced  
429 from mass culture (bulk DNA-seq) seven days post self-fertilization (D7) and used as  
430 reference. To conduct the single-cell DNA-seq (time-course) experiment, four lines were  
431 derived from the parental clonal population and cultured in daily re-isolation regime  
432 **(Beisson et al. 2010)**. Single cells were collected in quadruplicates during vegetative  
433 growth at five (D5), ten (D10) and fourteen (D14) days post autogamy, and a total of 13  
434 samples (12 scDNA-seq + 1 Bulk DNA-seq) were subjected to Whole Genome  
435 Amplification and sequencing. One single cell sample was excluded due to low coverage.  
436 Before expanding to mass culture, the progeny of a single sister cell derived from self-  
437 fertilization was cultured in daily re-isolation, thus the parental mass culture and the single-  
438 cell lines had identical germline genomes and somatic genome configurations before the  
439 experiment. Post-autogamous cells of *Paramecium tetraurelia* strain d12 were propagated  
440 in isolation cultures at 25 °C as described in **(Vitali et al. 2019)**.

### 441 **Amplification biases of MDA-based Whole Genome Amplification**

442           The degree and direction of GC bias from DNA-seq data was evaluated as follows.  
443 SAM files were converted to binary, sorted and indexed with SAMtools (version 1.4.1) **(Li**  
444 **et al. 2009)**. Detailed GC bias metrics were collected from mapped reads using the

445 CollectGcBiasMetrics tool of the Picard suite (<http://broadinstitute.github.io/picard/>). GC  
446 bias estimates were calculated as the slope of the linear regression of normalized  
447 coverage on GC content between 9 and 50% GC (the two extreme GC content values of  
448 *P. tetraurelia*'s genome). For convenience, GC bias estimates are expressed as change of  
449 normalized coverage every 10% change in GC content. For a sequencing experiment with  
450 mean coverage of 100x, a GC bias of +0.20 corresponds to an increase in coverage of 20  
451 reads every 10% increase in GC content.

452         The underrepresentation of scaffold ends (here dubbed *terminal bias*) was  
453 evaluated as follows. The 115 telomere-capped scaffolds (full-length macronuclear  
454 chromosomes) reported in **(Aury et al. 2006)** were selected for the terminal bias analysis.  
455 Coverage information was extracted from mapped reads using bedtools  
456 (<https://bedtools.readthedocs.io/en/latest/index.html>). The median base coverage of 49  
457 2kb-overlapping windows (1kb overlap) spanning 50kb from either end of the 115  
458 telomere-capped chromosomes was calculated for each sample. Terminal bias estimates  
459 were calculated as the slope of the linear regression (which approximates the true  
460 parabolic relationship) of normalized windows coverage on distance from scaffold ends (up  
461 to 30kb away from the termini where the increase in coverage plateaus). For convenience,  
462 terminal bias estimates are expressed as change of normalized window coverage every  
463 10kb change in distance from chromosome termini. A terminal bias of +0.30 corresponds  
464 to an increase in coverage of 30 reads every 10kb increase in distance from the  
465 chromosome ends for a sequencing experiment with 100x median base coverage. A  
466 FASTQ file was artificially generated from *P. tetraurelia*'s reference genome with  
467 ArtificialFastqGenerator **(Frampton and Houlston 2012)** and included as a bias-free

468 reference (aDNA). Multiple samples were processed using custom bash scripts. All data  
469 analyses were performed in R (**R Core Team 2020**).

#### 470 **IES detection and estimation of retention levels**

471 The extent to which somatic mutations can be detected in the AT-rich genome of *P.*  
472 *tetraurelia* using (MDA-based-) scDNA-seq was evaluated by tracking Internal Eliminated  
473 Sequences (IESs) across multiple asexual divisions. IES detection and quantification of  
474 their retention levels were performed as in (**Vitali et al. 2019**) using ParTIES (**Denby**  
475 **Wilkes, Arnaiz, and Sperling 2016**).

#### 476 **Quantification of the measurement error for IRS estimates**

477 The *random error* of the empirical estimates of IES retention scores (IRSs) was  
478 quantified as follows. Briefly, IRSs were estimated genome-wide on all 11 scDNA-seq  
479 samples using ParTIES' MIRET module ran with the *Boundaries* method. For each IES,  
480 the module estimates the retention scores on both IES-flanking boundaries (left and right).  
481 Low coverage IESs ( $\text{SUPPORT\_MAC} + \text{SUPPORT\_LEFT} + \text{SUPPORT\_RIGHT} < 20$   
482 reads) and IESs with IRSs  $< 0.1$  ( $\text{IRS\_left} \& \text{IRS\_right} < 0.1$ ) were removed from the set  
483 before downstream analyses. Significant differences between left and right retention levels  
484 were tested with a binomial test. *P* values were corrected for multiple testing using the  
485 Benjamini–Hochberg procedure. IESs with significantly different left and right retention  
486 levels ( $P_{adj} < 0.05$ , 30 in total) were removed from subsequent analyses to exclude rare  
487 events of differential usage of IES boundaries (**Arnaiz et al. 2012; Duret et al. 2008**). IESs



488 with no variability between left and right scores (304 in total) were also discarded as they  
489 represent short IESs whose boundaries are spanned by the same reads (which results in  
490 identical scores). A final set of 1,196 IESs was used to estimate the distribution of *random*  
491 *errors* on empirical retention levels. For each IES, the *relative random error* of the retention  
492 level was taken as the coefficient of variation of the boundary scores ( $SD_{\text{bIRS}} / \text{bIRS}$ , where  
493 bIRS is the mean boundary IRS score).

#### 494 **Quantification of IES dropout**

495 *Total IES dropout* was calculated as the fraction of all known IES loci ( $n=44,928$ )  
496 with read coverage equal or lower than 20, as a minimum of 20 reads is desirable for  
497 robust estimation of IES retention levels (IRS) across most of the IRS spectrum. *Terminal*  
498 *IES dropout* was calculated as the fraction of all known IES loci located within 30 kb from  
499 either scaffold ends ( $n=9,986$ ) and with a read coverage equal or lower than 20. A *residual*  
500 *IES dropout*, likely unrelated to amplification biases, is found in the mcDNA sample (see  
501 **Table 2**). This term is assumed to scale negatively with the number of read pairs mapped.  
502 For any given scDNA sample, the *residual IES dropout* was calculated as the *residual IES*  
503 *dropout* found in the mcDNA sample scaled on the sc / mc ratio of mapped read pairs:

504  $Residual\ dropout_{sc} = Residual\ dropout_{mc} / \text{mapped read pairs (sc / mc)}$

505 Last, IES dropout attributed to the positive GC bias was calculated as the dropout  
506 unexplained by either of the *terminal* or *residual dropout* terms:

$$507 \text{ GC dropout} = \text{Total dropout} - (\text{Terminal} + \text{Residual})$$

## 508 DNA isolation and sequencing

509 The somatic genome of the parental population used as a reference to assess the  
510 genome representation biases of the scDNA-seq technology was obtained as follows.  
511 Somatic nuclei were isolated from a caryonidal mass culture seven days post self-  
512 fertilization. ~10 µg of genomic DNA were purified from 500 ml mass culture in early  
513 stationary phase ( $5 \times 10^5$  *Paramecium* cells). The culture was cleaned up by filtration  
514 through 8 layers of gauze, cells concentrated on a Nitex filter (Nylon-Netzfilter, 10 µm pore  
515 size, 47 mm, Merck KGaA) and pelleted by centrifugation at 800 xRCF for 3 min. Collected  
516 cells were stored 1h in Volvic® water before cell lysis to reduce bacterial load. Cells were  
517 homogenized in 4 ml of lysis buffer (0.25 M sucrose; 10 mM MgCl<sub>2</sub>; 10 mM Tris pH 6.8;  
518 0.2% NP40) (**Arnaiz et al. 2012**) by repeated crushing in a syringe barrel (20 ml, 60x25  
519 hypodermic needle). Cell content was washed in 10ml of lysis buffer and macronuclei  
520 (MACs) isolated by centrifugation at 1000 xRCF for 15 min at 4°C. Isolated MACs were  
521 pre-lysed and gDNA extracted with the NucleoSpin® Tissue Kit following manufacturer's  
522 instructions for DNA isolation from cultured cells.

523 Single, daily re-isolated *Paramecium* cells strain d12 were washed three times in  
524 Volvic® water before DNA amplification and sequencing. Washed cells were subjected to

525 whole genome, Multiple Displacement Amplification (MDA) using the REPLI-g Single Cell  
526 Kit (© QIAGEN). The parental somatic DNA from mass culture and whole genome  
527 amplification products from single cells (scDNA) were subjected to Paired-End Illumina  
528 sequencing (150 bp) on a Novaseq 6000 platform at the Functional Genomic Center  
529 Zurich. A total of 12 scDNA samples and 1 bulk DNA sample were sequenced.

### 530 **Mathematical Modeling of Somatic Assortment**

531 To model the probability distribution of mutant alleles (IES<sup>+</sup> copies) across amitotic  
532 divisions, we leveraged previously published mathematical models of somatic assortment  
533 for ciliates (**Bell 2009; Preer 1976**).

534 For the *haploid subunit model* we made the following assumptions:

535 a.i The ploidy of the somatic nucleus,  $k$ , is assumed to be 860 (**Allen and**  
536 **Gibson 1972; Woodard et al. 1961**).

537 a.ii The total number of segregating units in the nucleus,  $N$ , is conserved, and  
538 amounts to  $2 * k$  (1720) after DNA replication.

539 a.iii Each daughter cell receives an equal number of copies,  $k$ , at each cell  
540 division.

541 a.iv The number of successes is a natural number ranging from 0 to  $k$ .

542 a.v The process operates in a selection-free environment.

543 For the *chromosomal model*, we introduced the following modifications:

544 a.i We assumed 115 somatic chromosomes (*Chr*)

545 a.ii The total number of segregating units,  $N$ , is conserved and amounts to  $2 * k * Chr$  (197,800) after DNA replication.

547 a.iii Each daughter cell receives an equal number of copies,  $N/2$ , at each cell  
548 division.

549 a.iv The number of successes is a natural number ranging from 0 to  $N/2$ .

550 The following treatment refers to the *haploid model* notation but may be extended to  
551 the *chromosomal model* when the modifications reported above are introduced. After a first  
552 asexual generation (gen=1), the probability distribution  $P(X)$  of the number of IES<sup>+</sup> copies  
553 (mutated alleles) per nucleus in the daughter cells (number of successes  $x$ ), represented  
554 by the random variable  $X$ , is a function of the number of IES<sup>+</sup> copies in the parental  
555 nucleus,  $y_0$ , and the number of copies inherited (drawn) upon division,  $k$ . The number of  
556 IES<sup>+</sup> copies in the parental nucleus (successful elements  $m$ ) available before division (after  
557 DNA doubling) equals  $2y_0$ .

558  $P(X)$  is given by the probability mass function of the hypergeometric distribution:

$$559 \quad P_{(X=x, G=1)} = \binom{2k}{k}^{-1} \binom{2y_0}{x} \binom{2k-2y_0}{k-x} \quad (1)$$

560 For the following generation,  $G = t+1$ , for each  $x$ ,  $P(X, t+1)$  is the summation  
561 between  $y = x/2$  and  $y = (k+x) / 2$  of the product of the probability calculated in (1), denoted  
562  $P(X = y, t)$  at  $G = t+1$ , and the probability of receiving  $x$  IES<sup>+</sup> copies, for the range of  
563 possible parental IES<sup>+</sup> copies  $y$  ( $x/2; (k+2)/2$ ) from which  $x$  could have been arisen. Thus,  
564  $P(X, t+1)$  becomes:

$$565 \quad P_{(X=x, t+1)} = \binom{2k}{k}^{-1} \sum_{y=x/2}^{(k+x)/2} P_{(X=y, t)} \binom{2y}{x} \binom{2k-2y}{k-x} \quad (2)$$

566 For any given number of successes  $x$  (number of IES<sup>+</sup> copies received), the number  
567 of IES<sup>+</sup> copies in the parental nuclei after DNA replication,  $2y$ , must have been at least  $x$ ,  
568 as the number of IES<sup>+</sup> copies inherited ( $x$ ) is at most equal to the total number of IES<sup>+</sup>  
569 copies available in the nucleus at the time of division ( $x_{\max} = 2y$ ), and could have not  
570 exceeded  $k + x$ , as  $x$  is at least equal to the number of IES<sup>+</sup> copies present in excess with  
571 respect to  $k$ , the number of elements inherited upon division ( $x_{\min} = 2y - k$ ). Note that the  
572 theoretical equivalent of the IES Retention Score (IRS calculated experimentally) is given  
573 by  $IRS = x/k$ .

## 574 Rate of somatic assortment

575 We define the rate of somatic assortment as the change in the standard deviation,  
576  $\sigma$ , of the probability distribution of the fraction of mutated alleles (IES<sup>+</sup>) in the nuclei across  
577 sexual generations. At generation  $t$ ,  $\sigma$  is given by:

$$578 \quad \sigma_t = \sqrt{E[(X - \mu)^2]} = k^{-1} \sqrt{\sum_{x=1}^K [x^2 P_{(X=x,t)}] - \left[\sum_{x=1}^K x P_{(X=x,t)}\right]^2} \quad (3)$$

579 Within 200 divisions (full clonal cycle of *P. tetraurelia*),  $\sigma(\text{IRS}_0, t)$  is approximated by:

$$580 \quad \sigma_{(\text{IRS}_0, G=t)} = a \sqrt{t} \sqrt{\text{IRS}_0 - \text{IRS}_0^2} \quad (4)$$

581 Where  $\text{IRS}_0$  (the starting parental retention level) can assume values between 0.1  
582 and 0.9 in steps of 0.1, and the parameter  $a$  is equal to 0.0245 (1.4201\*0.0245 for the  
583 chromosomal model). Thus, for each  $\text{IRS}_0$ , the (instantaneous) rate of somatic assortment  
584 is the derivative function of  $\sigma$  with respect to  $t$  calculated as follows:

$$585 \quad f'(G=t) = a \sqrt{\text{IRS}_0 - \text{IRS}_0^2} \frac{1}{2\sqrt{t}} \quad (5)$$

## 586 **Rate of loss of Heterozygosity**

587           The process of somatic assortment eventually leads to the complete loss of the  
588 heterozygous state, with nuclei containing only either mutated (IES<sup>+</sup>) or wild type alleles  
589 (IES<sup>-</sup>). The rate of loss of heterozygosity due to somatic assortment is calculated as the  
590 change of the cumulative probability of the heterozygous state,  $H$ , across asexual  
591 generations.  $H$ , at generation  $t$ , is given by:

$$592 \quad H_{(t)} = \sum_{x=1}^{(k-1)} P_{(X=x,t)} \quad (6)$$

593           Both the haploid and chromosomal models assume that the total number of  
594 segregating units is conserved and that each of the two daughter cells receives exactly  
595 half that amount at each division. However, in the chromosomal model the total number of  
596 copies of a given locus is not fixed and the *number* of IES<sup>+</sup> copies will slowly tend toward a  
597 third absorbing boundary (in addition to only IES<sup>+</sup> or only IES<sup>-</sup> copies): no copies of either  
598 alleles (*nullisomic* locus). Nevertheless, as this tendency toward chromosomal loss will  
599 affect both alleles, we assumed the *relative fraction* of IES<sup>+</sup> copies (retention level) to  
600 remain symmetrical. Equation (4) is a previously-unpublished mathematical equation  
601 determined through evolutionary searches performed with the A.I.-powered modeling  
602 engine Eureqa (<https://www.nutonian.com/products/eureqa/>).

## 603 **Bioinformatic simulation of somatic assortment**

604 Through bioinformatic simulations we estimated the probability distribution of  
605 mutated alleles ( $P(X)$ ), its standard deviation ( $\sigma$ ), and the fraction of heterozygous cells  
606 ( $H$ ), across successive asexual generations. We simulated the process for the daily re-  
607 isolation and mass culture regimes, with daily bottlenecks of 1 and  $2^{12}$  (4096) cells (for a  
608 culture of ~50 ml), respectively. The assumptions to model somatic assortment were  
609 identical to those made for the mathematical simulation with the *haploid model* (a.i – a.v).  
610 The 860 binary subunits (two parental haplotypes) were represented with binary digits  
611 (bits). The simulation was started with an input ratio of 0.5 (430 zeros and 430 ones). Cell  
612 division was simulated by drawing an equal number of subunits (860 bits) without  
613 replacement from a single set (G2 cell, 1720 bits), followed by partitioning into two sets  
614 (daughter cells). For each iteration (day) of simulated isolation culture (daily re-isolation), a  
615 single, randomly selected founder cell was used to start a series of 4 successive *in silico*  
616 cell divisions (4 div. / Day), which produced  $2^4$  (16) cells. The process was repeated  $2^{10}$   
617 (1,024) times to simulate replicate isolation cultures, for a total of  $2^{14}$  (16,384) cells ( $N = 2^4 * 2^{10} = 2^{14}$ )  
618 across replicates. In contrast, for each iteration (day) of simulated mass culture,  
619  $2^{10}$  (1,024), randomly selected founder cells (*inoculum*) were used to commence a series  
620 of 4 successive *in silico* cell divisions, which produced a total of  $2^{14}$  (16,384) cells ( $N = 2^{10} * 2^4 = 2^{14}$ ).  
621 The simulation was protracted for 200 generations.



## 622 **Experimental estimates of somatic assortment**

623           To study somatic assortment experimentally, we sequenced the somatic genome of  
624 single cells using scDNA-seq across ~50 asexual divisions (see Experiment outline). Cells  
625 divided on average ~3.5 times per day (25°C) in all single cell lines studied. IRS values  
626 were determined experimentally at Day 5 (*gen* ~17), Day 10 (*gen* ~35) and Day 14 (*gen*  
627 ~49). To account for the amplification biases introduced by the MDA reaction, a set of  
628 somatic IESs (IRS > 0.1 at Day 5) with coverage greater than 20 reads shared by all 11  
629 scDNA samples was selected (track set,  $n = 75$ ) for further analysis.

## 630 **Simulation of retention levels and confidence intervals**

631           The mean retention levels measured experimentally 5 days post self-fertilization  
632 (D5, *gen* = 17,  $n = 4$ ) were taken as starting retention levels (IRS<sub>0</sub>) to initiate the somatic  
633 assortment simulation. The probability distribution of the fraction of IES copies (simulated  
634 IRSs) expected at generation ~35 (D10) and ~49 (D14) was calculated individually for  
635 each IES locus in the track set ( $N = 75$ ). The predicted standard deviation ( $\sigma$ ) was  
636 calculated from the simulated probability distribution using equation 3.  $\sigma$  was then used to  
637 construct a 95% Confidence Interval (CI95) around IRS<sub>0</sub> for each of the 75 IES loci in the  
638 track set. Due to the high ploidy of *P. tetraurelia* (~860), the simulated IRS probability  
639 distributions approximate the normal distribution within the ~50 asexual generations  
640 investigated in this study (for  $0.1 < \text{IRS}_0 < 0.9$ ). Thus, the CI95 was calculated for Day 10  
641 (Day 10 – Day 5, ~17 *gen*), and Day 14 (D14 – D5, ~31 *gen*) as  $\text{IRS}_0 \pm 2 \cdot \sigma(\text{IRS}_0, \text{gen})$  (0

642  $\leq x \leq 1$ ), with  $\sigma$  being a function of  $IRS_0$  and the number of generations occurred (under the  
643 adopted model, equation (3-4)).

644 **Data availability**

645 All DNA reads generated in this study are available in the European Nucleotide  
646 Archive (<https://www.ebi.ac.uk/ena/browser/home>) under the study accession number  
647 PRJEB43365. All data generated or analyzed during this study will be provided as  
648 Supplementary Information files.

649 **Code availability**

650 All custom R scripts associated with this submission will be provided as  
651 Supplementary Code. The software used to simulate the random segregation of genetic  
652 elements in polyploid nuclei (**Vitali et al. 2021**) is available at  
653 <https://doi.org/10.5281/zenodo.4573521> licensed under the MIT license.

## 654 **References**

- 655 Allen, Sally, and Ian Gibson. 1972. "Genome Amplification and Gene Expression in the  
656 Ciliate Macronucleus." *Biochemical Genetics* 6(4):293–313. doi:  
657 10.1007/BF00486122.
- 658 Arnaiz, Olivier, Nathalie Mathy, Céline Baudry, Sophie Malinsky, Jean Marc Aury, Cyril  
659 Denby Wilkes, Olivier Garnier, Karine Labadie, Benjamin E. Lauderdale, Anne Le  
660 Mouël, Antoine Marmignon, Mariusz Nowacki, Julie Poulain, Malgorzata Prajer,  
661 Patrick Wincker, Eric Meyer, Sandra Duharcourt, Laurent Duret, Mireille Bétermier,  
662 and Linda Sperling. 2012. "The Paramecium Germline Genome Provides a Niche for  
663 Intragenic Parasitic DNA: Evolutionary Dynamics of Internal Eliminated Sequences."  
664 *PLoS Genetics* 8(10). doi: 10.1371/journal.pgen.1002984.
- 665 Aury, Jean-Marc, Olivier Jaillon, Laurent Duret, Benjamin Noel, Claire Jubin, Betina M.  
666 Porcel, Béatrice Ségurens, Vincent Daubin, Véronique Anthouard, Nathalie Aiach,  
667 Olivier Arnaiz, Alain Billaut, Janine Beisson, Isabelle Blanc, Khaled Bouhouche,  
668 Francisco Câmara, Sandra Duharcourt, Roderic Guigo, Delphine Gogendeau, Michael  
669 Katinka, Anne-Marie Keller, Roland Kissmehl, Catherine Klotz, France Koll, Anne Le  
670 Mouël, Gersende Lepère, Sophie Malinsky, Mariusz Nowacki, Jacek K. Nowak,  
671 Helmut Plattner, Julie Poulain, Françoise Ruiz, Vincent Serrano, Marek Zagulski,  
672 Philippe Dessen, Mireille Bétermier, Jean Weissenbach, Claude Scarpelli, Vincent  
673 Schächter, Linda Sperling, Eric Meyer, Jean Cohen, and Patrick Wincker. 2006.  
674 "Global Trends of Whole-Genome Duplications Revealed by the Ciliate Paramecium  
675 Tetraurelia." *Nature* 444(7116):171–78. doi: 10.1038/nature05230.

- 676 Beale, G. H., and John R. Preer Jr. 2008a. "Micronuclei and Macronuclei." Pp. 139–49 in  
677 *Paramecium: genetics and epigenetics*. CRC Press.
- 678 Beale, G. H., and John R. Preer Jr. 2008b. "Micronuclei and Macronuclei." Pp. 139–49 in  
679 *Paramecium: genetics and epigenetics*. CRC Press.
- 680 Beisson, Janine, Mireille Bétermier, Marie Hélène Bré, Jean Cohen, Sandra Duharcourt,  
681 Laurent Duret, Ching Kung, Sophie Malinsky, Eric Meyer, John R. Preer, and Linda  
682 Sperling. 2010. "Maintaining Clonal Paramecium Tetraurelia Cell Lines of Controlled  
683 Age through Daily Reisolation." *Cold Spring Harbor Protocols* 5(1):pdb.prot5361. doi:  
684 10.1101/pdb.prot5361.
- 685 Bell, Graham. 2009. "Isolation Cultures." Pp. 13–22 in *Sex and Death in Protozoa*.  
686 Cambridge University Press.
- 687 Berger, J. D., and H. J. Schmidt. 1978. "Regulation of Macronuclear DNA Content in  
688 Paramecium Tetraurelia." *Journal of Cell Biology* 76(1):116–26. doi:  
689 10.1083/jcb.76.1.116.
- 690 Börgstrom, Erik, Marta Paterlini, Jeff E. Mold, Jonas Frisen, and Joakim Lundeberg. 2017.  
691 "Comparison of Whole Genome Amplification Techniques for Human Single Cell  
692 Exome Sequencing." *PLoS ONE* 12(2):e0171566. doi: 10.1371/journal.pone.0171566.
- 693 de Bourcy, Charles F. A., Iwijn De Vlaminck, Jad N. Kanbar, Jianbin Wang, Charles  
694 Gawad, and Stephen R. Quake. 2014. "A Quantitative Comparison of Single-Cell  
695 Whole Genome Amplification Methods" edited by K. Wang. *PLoS ONE* 9(8):e105585.  
696 doi: 10.1371/journal.pone.0105585.
- 697 Catania, Francesco, Casey L. McGrath, Thomas G. Doak, and Michael Lynch. 2013.  
698 "Spliced DNA Sequences in the Paramecium Germline: Their Properties and

- 699 Evolutionary Potential.” *Genome Biology and Evolution* 5(6):1200–1211. doi: 10.1093/  
700 gbe/evt087.
- 701 Catania, Francesco, François Wurmser, Alexey A. Potekhin, Ewa Przyboś, and Michael  
702 Lynch. 2009. “Genetic Diversity in the Paramecium Aurelia Species Complex.”  
703 *Molecular Biology and Evolution* 26(2):421–31. doi: 10.1093/molbev/msn266.
- 704 Child, C. M. 1907. “STUDIES ON THE RELATION BETWEEN AMITOSIS AND MITOSIS.”  
705 *The Biological Bulletin* 12(2):89–114. doi: 10.2307/1535772.
- 706 Conklin, Edwin G. 1917. “Mitosis and Amitosis.” *The Biological Bulletin* 33(6):396-[436]-1.  
707 doi: 10.2307/1536267.
- 708 Deleye, Lieselot, Laurentijn Tilleman, Ann Sophie Van Der Plaetsen, Senne Cornelis,  
709 Dieter Deforce, and Filip Van Nieuwerburgh. 2017. “Performance of Four Modern  
710 Whole Genome Amplification Methods for Copy Number Variant Detection in Single  
711 Cells.” *Scientific Reports* 7(1):1–9. doi: 10.1038/s41598-017-03711-y.
- 712 Denby Wilkes, Cyril, Olivier Arnaiz, and Linda Sperling. 2016. “ParTIES: A Toolbox for  
713 Paramecium Interspersed DNA Elimination Studies.” *Bioinformatics* 32(4):599–601.  
714 doi: 10.1093/bioinformatics/btv691.
- 715 Doerder, F. P., J. C. Deak, and J. H. Lief. 1992. “Rate of Phenotypic Assortment  
716 InTetrahymena Thermophila.” *Developmental Genetics* 13(2):126–32. doi:  
717 10.1002/dvg.1020130206.
- 718 Duharcourt, Sandra, and Mireille Betermier. 2014. “Programmed Rearrangement in  
719 Ciliates: Paramecium.” *Microbiology Spectrum* 2(6). doi:  
720 10.1128/microbiolspec.MDNA3-0035-2014.

- 721 Duncan, Andrew W., Amy E. Hanlon Newell, Weimin Bi, Milton J. Finegold, Susan B.  
722 Olson, Arthur L. Beaudet, and Markus Grompe. 2012. “Aneuploidy as a Mechanism  
723 for Stress-Induced Liver Adaptation.” *Journal of Clinical Investigation* 122(9):3307–15.  
724 doi: 10.1172/JCI64026.
- 725 Duncan, Andrew W., Matthew H. Taylor, Raymond D. Hickey, Amy E. Hanlon Newell,  
726 Michelle L. Lenzi, Susan B. Olson, Milton J. Finegold, and Markus Grompe. 2010.  
727 “The Ploidy Conveyor of Mature Hepatocytes as a Source of Genetic Variation.”  
728 *Nature* 467(7316):707–10. doi: 10.1038/nature09414.
- 729 Duret, Laurent, Jean Cohen, Claire Jubin, Philippe Dessen, Jean-françois François Goût,  
730 Sylvain Mousset, Jean-marc Marc Aury, Olivier Jaillon, Benjamin Noël, Olivier Arnaiz,  
731 Mireille Bétermier, Patrick Wincker, Eric Meyer, Linda Sperling, Jean-marc Marc Aury,  
732 Olivier Jaillon, Benjamin Noël, Olivier Arnaiz, Mireille Bétermier, Patrick Wincker, Eric  
733 Meyer, and Linda Sperling. 2008. “Analysis of Sequence Variability in the  
734 Macronuclear DNA of Paramecium Tetraurelia : A Somatic View of the Germline.”  
735 *Genome Research* 18(4):585–96. doi: 10.1101/gr.074534.107.
- 736 Eisen, Jonathan A., Robert S. Coyne, Martin Wu, Dongying Wu, Mathangi Thiagarajan,  
737 Jennifer R. Wortman, Jonathan H. Badger, Qinghu Ren, Paolo Amedeo, Kristie M.  
738 Jones, Luke J. Tallon, Arthur L. Delcher, Steven L. Salzberg, Joana C. Silva, Brian J.  
739 Haas, William H. Majoros, Maryam Farzad, Jane M. Carlton, Roger K. Smith, Jyoti  
740 Garg, Ronald E. Pearlman, Kathleen M. Karrer, Lei Sun, Gerard Manning, Nels C.  
741 Elde, Aaron P. Turkewitz, David J. Asai, David E. Wilkes, Yufeng Wang, Hong Cai,  
742 Kathleen Collins, B. Andrew Stewart, Suzanne R. Lee, Katarzyna Wilamowska, Zasha  
743 Weinberg, Walter L. Ruzzo, Dorota Wloga, Jacek Gaertig, Joseph Frankel, Che-Chia  
744 Tsao, Martin A. Gorovsky, Patrick J. Keeling, Ross F. Waller, Nicola J. Patron, J.

- 745 Michael Cherry, Nicholas A. Stover, Cynthia J. Krieger, Christina del Toro, Hilary F.  
746 Ryder, Sondra C. Williamson, Rebecca A. Barbeau, Eileen P. Hamilton, and Eduardo  
747 Orias. 2006. "Macronuclear Genome Sequence of the Ciliate *Tetrahymena*  
748 *Thermophila*, a Model Eukaryote" edited by M. Gelfand. *PLoS Biology* 4(9):e286. doi:  
749 10.1371/journal.pbio.0040286.
- 750 Erenpreisa, Jekaterina, Kristine Salmina, Anda Huna, Elizabeth A. Kosmacek, Mark S.  
751 Cragg, Fiorenza Ianzini, and Alim P. Anisimov. 2011. "Polyploid Tumour Cells Elicit  
752 Paradiploid Progeny through Depolyploidizing Divisions and Regulated Autophagic  
753 Degradation." *Cell Biology International* 35(7):687–95. doi: 10.1042/CBI20100762.
- 754 Flemming, W. 1891. "Ueber Theilung Und Kernformen Bei Leukocyten, Und Über Deren  
755 Attractionsphären." *Archiv Für Mikroskopische Anatomie* 37(1):249–98. doi: 10.1007/  
756 BF02954297.
- 757 Fox, Donald T., and Robert J. Duronio. 2013. "Endoreplication and Polyploidy: Insights into  
758 Development and Disease." *Development (Cambridge)* 140(1):3–12. doi:  
759 10.1242/dev.080531.
- 760 Frampton, Matthew, and Richard Houlston. 2012. "Generation of Artificial FASTQ Files to  
761 Evaluate the Performance of Next-Generation Sequencing Pipelines" edited by J. H.  
762 Badger. *PLoS ONE* 7(11):e49110. doi: 10.1371/journal.pone.0049110.
- 763 Gilley, David, and Elizabeth H. Blackburn. 1994. "Lack of Telomere Shortening during  
764 Senescence in *Paramecium*." *Proceedings of the National Academy of Sciences of*  
765 *the United States of America* 91(5):1955–58. doi: 10.1073/pnas.91.5.1955.
- 766 Guérin, Frédéric, Olivier Arnaiz, Nicole Boggetto, Cyril Denby Wilkes, Eric Meyer, Linda  
767 Sperling, Sandra Duharcourt, Cyril Denby Wilkes, Eric Meyer, Linda Sperling, and



- 768 Sandra Duhaucourt. 2017. "Flow Cytometry Sorting of Nuclei Enables the First Global  
769 Characterization of Paramecium Germline DNA and Transposable Elements." *BMC*  
770 *Genomics* 18(1):327. doi: 10.1186/s12864-017-3713-7.
- 771 Hagen, Rebecca, Valerio Vitali, and Francesco Catania. 2020. "Cross-Generational Effects  
772 and Non-Random Developmental Response to Temperature Variation in  
773 Paramecium." *Frontiers in Cell and Developmental Biology* 8:1169. doi:  
774 10.3389/fcell.2020.584219.
- 775 Hamilton, Eileen P., Aurélie Kapusta, Piroska E. Huvos, Shelby L. Bidwell, Nikhat Zafar,  
776 Haibao Tang, Michalis Hadjithomas, Vivek Krishnakumar, Jonathan H. Badger,  
777 Elisabet V. Caler, Carsten Russ, Qiandong Zeng, Lin Fan, Joshua Z. Levin, Terrance  
778 Shea, Sarah K. Young, Ryan Hegarty, Riza Daza, Sharvari Gujja, Jennifer R.  
779 Wortman, Bruce W. Birren, Chad Nusbaum, Jainy Thomas, Clayton M. Carey, Ellen J.  
780 Pritham, Cédric Feschotte, Tomoko Noto, Kazufumi Mochizuki, Romeo Papazyan,  
781 Sean D. Taverna, Paul H. Dear, Donna M. Cassidy-Hanley, Jie Xiong, Wei Miao,  
782 Eduardo Orias, and Robert S. Coyne. 2016. "Structure of the Germline Genome of  
783 Tetrahymena Thermophila and Relationship to the Massively Rearranged Somatic  
784 Genome." *ELife* 5(NOVEMBER2016). doi: 10.7554/eLife.19090.001.
- 785 Huang, Lei, Fei Ma, Alec Chapman, Sijia Lu, and Xiaoliang Sunney Xie. 2015. "Single-Cell  
786 Whole-Genome Amplification and Sequencing: Methodology and Applications."  
787 *Annual Review of Genomics and Human Genetics* 16(1):79–102. doi:  
788 10.1146/annurev-genom-090413-025352.
- 789 Johri, Parul, Sascha Krenek, Georgi K. Marinov, Thomas G. Doak, Thomas U. Berendonk,  
790 and Michael Lynch. 2017. "Population Genomics of Paramecium Species." *Molecular*  
791 *Biology and Evolution* 34(5):1194–1216. doi: 10.1093/molbev/msx074.

- 792 Kuhn, Evelyn M., Eeva Therman, and Barbara Susman. 1991. "Amitosis and Endocycles  
793 in Early Cultured Mouse Trophoblast." *Placenta* 12(3):251–61. doi: 10.1016/0143-  
794 4004(91)90006-2.
- 795 Lage, José M., John H. Leamon, Tanja Pejovic, Stefan Hamann, Michelle Lacey, Deborah  
796 Dillon, Richard Seagraves, Bettina Vossbrinck, Antonio González, Daniel Pinkel, Donna  
797 G. Albertson, Jose Costa, and Paul M. Lizardi. 2003. "Whole Genome Analysis of  
798 Genetic Alterations in Small DNA Samples Using Hyperbranched Strand  
799 Displacement Amplification and Array-CGH." *Genome Research* 13(2):294–307. doi:  
800 10.1101/gr.377203.
- 801 Lasken, Roger S., and Michael Egholm. 2003. "Whole Genome Amplification: Abundant  
802 Supplies of DNA from Precious Samples or Clinical Specimens." *Trends in*  
803 *Biotechnology* 21(12):531–35. doi: 10.1016/j.tibtech.2003.09.010.
- 804 Li, Heng, Bob Handsaker, Alec Wysoker, Tim Fennell, Jue Ruan, Nils Homer, Gabor  
805 Marth, Goncalo Abecasis, and Richard Durbin. 2009. "The Sequence Alignment/Map  
806 Format and SAMtools." *Bioinformatics*. doi: 10.1093/bioinformatics/btp352.
- 807 Lucchetta, Elena M., and Benjamin Ohlstein. 2017. "Amitosis of Polyploid Cells  
808 Regenerates Functional Stem Cells in the Drosophila Intestine." *Cell Stem Cell*  
809 20(5):609-620.e6. doi: 10.1016/j.stem.2017.02.012.
- 810 Luquette, Lovelace J., Craig L. Bohrson, Max A. Sherman, and Peter J. Park. 2019.  
811 "Identification of Somatic Mutations in Single Cell DNA-Seq Using a Spatial Model of  
812 Allelic Imbalance." *Nature Communications* 10(1):1–14. doi: 10.1038/s41467-019-  
813 11857-8.

- 814 Lyn, Denis H. 2010. "Phylum CILIOPHORA – Conjugating, Ciliated Protists with Nuclear  
815 Dualism." Pp. 89–120 in *The Ciliated Protozoa*, edited by D. H. Lyn. Dordrecht:  
816 Springer Dordrecht Heidelberg London New York.
- 817 Macklin, C. C. 1916. "Amitosis in Cells Growing in Vitro." *The Biological Bulletin* 30(6):445-  
818 [466]-1. doi: 10.2307/1536358.
- 819 Maurer-Alcalá, Xyrus X., Rob Knight, and Laura A. Katz. 2018. "Exploration of the  
820 Germline Genome of the Ciliate *Chilodonella uncinata* through Single-Cell Omics  
821 (Transcriptomics and Genomics)." *MBio* 9(1). doi: 10.1128/mBio.01836-17.
- 822 Meier, Andreas, Evelyn Fricke, Evelyn Fisch, Silke Baedker, Holger Wedler, and Christian  
823 Korfhage. n.d. *Genomic Analysis of Individual Cells by NGS and Real-Time PCR*.
- 824 Merriam, E. V., and P. J. Bruns. 1988. "Phenotypic Assortment in *Tetrahymena*  
825 *thermophila*: Assortment Kinetics of Antibiotic-Resistance Markers, TSA, Death, and  
826 the Highly Amplified rDNA Locus." *Genetics* 120(2):389–95.
- 827 Miller, R. H. 1980. "Amitosis and Endocytogenesis in the Fruit of *Malus sylvestris*." *Annals*  
828 *of Botany* 46(5):567–75. doi: 10.1093/oxfordjournals.aob.a085955.
- 829 Nakahara, Waro. 1917. "Preliminary Note on the Nuclear Division in the Adipose Cells of  
830 Insects." *The Anatomical Record* 13(2):81–86. doi: 10.1002/ar.1090130203.
- 831 Nanney, D. L., and R. M. Preparata. 1979. "Genetic Evidence Concerning the Structure of  
832 the *Tetrahymena thermophila* Macronucleus\*†." *The Journal of Protozoology*  
833 26(1):2–9. doi: 10.1111/j.1550-7408.1979.tb02722.x.
- 834 Nanney, David L. 1980. "Mating Tactics and Ecogenetic Strategies." Pp. 85–94 in  
835 *Experimental Ciliatology: An Introduction to Genetic and Developmental Analysis in*  
836 *Ciliates*. John Wiley & Sons, Ltd.

- 837 Nyberg, Dennis. 1976. "Are Macronuclear Subunits in Paramecium Functionally Diploid?"  
838 *Genetical Research* 27(2):239–48. doi: 10.1017/S0016672300016438.
- 839 Orias, E., and M. Flacks. 1975. "Macronuclear Genetics of Tetrahymena. I. Random  
840 Distribution of Macronuclear Gene Copies in T. Pyriformis, Syngen 1." *Genetics*  
841 79(2):187–206. doi: 10.1093/genetics/79.2.187.
- 842 Orias, Eduardo. 1991. "Evolution of Amitosis of the Ciliate Macronucleus: Gain of the  
843 Capacity to Divide." *The Journal of Protozoology* 38(3):217–21. doi: 10.1111/j.1550-  
844 7408.1991.tb04431.x.
- 845 Pfitzer, P. 1980. "Amitosis: A Historical Misinterpretation?" *Pathology Research and*  
846 *Practice* 167(2–4):292–300. doi: 10.1016/S0344-0338(80)80059-8.
- 847 Pinard, Robert, Alex de Winter, Gary J. Sarkis, Mark B. Gerstein, Karrie R. Tartaro,  
848 Ramona N. Plant, Michael Egholm, Jonathan M. Rothberg, and John H. Leamon.  
849 2006. "Assessment of Whole Genome Amplification-Induced Bias through High-  
850 Throughput, Massively Parallel Whole Genome Sequencing." *BMC Genomics* 7:216.  
851 doi: 10.1186/1471-2164-7-216.
- 852 Van Der Plaetsen, Ann Sophie, Lieselot Deleye, Senne Cornelis, Laurentijn Tilleman, Filip  
853 Van Nieuwerburgh, and Dieter Deforce. 2017. "STR Profiling and Copy Number  
854 Variation Analysis on Single, Preserved Cells Using Current Whole Genome  
855 Amplification Methods." *Scientific Reports* 7(1):1–9. doi: 10.1038/s41598-017-17525-  
856 5.
- 857 Preer, John R. 1976. "Quantitative Predictions of Random Segregation Models of the  
858 Ciliate Macronucleus." *Genetical Research* 27(2):227–38. doi:  
859 10.1017/S0016672300016426.

- 860 Preer, John R., and Louise B. Preer. 1979. "The Size of Macronuclear DNA and Its  
861 Relationship to Models for Maintaining Genic Balance\*†." *The Journal of Protozoology*  
862 26(1):14–18. doi: 10.1111/j.1550-7408.1979.tb02724.x.
- 863 R Core Team. 2020. "R: A Language and Environment for Statistical Computing." R  
864 Foundation for Statistical Computing, Vienna, Au.
- 865 Sabina, Jeffrey, and John H. Leamon. 2015. "Bias in Whole Genome Amplification:  
866 Causes and Considerations." Pp. 15–41 in *Methods in Molecular Biology*. Vol. 1347.  
867 Humana Press Inc.
- 868 Schoenfelder, Kevin P., and Donald T. Fox. 2015. "The Expanding Implications of  
869 Polyploidy." *Journal of Cell Biology* 209(4):485–91.
- 870 Sonneborn, T. M. 1947. "Recent Advances in the Genetics of Paramecium and Euplotes."  
871 *Advances in Genetics* 1(C):263–358. doi: 10.1016/S0065-2660(08)60488-5.
- 872 Spring, Kevin J., Stephanie Pham, and Rebecca A. Zufall. 2013. "Chromosome Copy  
873 Number Variation and Control in the Ciliate *Chilodonella Uncinata*" edited by C.  
874 Fairhead. *PLoS ONE* 8(2):e56413. doi: 10.1371/journal.pone.0056413.
- 875 Videvall, Elin. 2018. "Plasmodium Parasites of Birds Have the Most AT-Rich Genes of  
876 Eukaryotes." *Microbial Genomics* 4(2). doi: 10.1099/mgen.0.000150.
- 877 Vitali, Valerio, Rebecca Hagen, and Francesco Catania. 2019. "Environmentally Induced  
878 Plasticity of Programmed DNA Elimination Boosts Somatic Variability in Paramecium  
879 Tetraurelia." *Genome Research* 29(10):1693–1704. doi: 10.1101/gr.245332.118.
- 880 Vitali, Valerio, Rebecca Hagen, and Francesco Catania. 2021. "SENES: Simulated  
881 Evolution of Nuclear Elements Segregation." *Zenodo*. doi: 10.5281/zenodo.4573521.

- 882 Woodard, J., Beatrice Gelber, and H. Swift. 1961. "Nucleoprotein Changes during the  
883 Mitotic Cycle in *Paramecium Aurelia*." *Experimental Cell Research* 23(2):258–64. doi:  
884 10.1016/0014-4827(61)90036-2.
- 885 Yiquan, Chen, and Wan Binkung. 1986. "A Study on Amitosis of the Nucleus of the  
886 Mammalian Cell." *Cells Tissues Organs* 127(1):69–76. doi: 10.1159/000146240.
- 887 Zhang, Hao, Joe A. West, Rebecca A. Zufall, and R. B. R. Azevedo. 2019. "Amitosis  
888 Confers Benefits of Sex in the Absence of Sex to Tetrahymena." *BioRxiv* 794735.
- 889 Zielke, Norman, Bruce A. Edgar, and Melvin L. DePamphilis. 2013. "Endoreplication." *Cold*  
890 *Spring Harbor Perspectives in Biology* 5(1):a012948.
- 891 Zufall, Rebecca A., Casey L. McGrath, Spencer V Muse, and Laura A. Katz. 2006.  
892 "Genome Architecture Drives Protein Evolution in Ciliates." *Molecular Biology and*  
893 *Evolution* 23(9):1681–87. doi: 10.1093/molbev/msl032.
- 894

## 895 **Acknowledgment**

896           This work was carried out within the research training group ‘Evolutionary  
897 Processes in Adaptation and Disease funded by the Deutsche Forschungsgemeinschaft  
898 (DFG, German Science Foundation) - 281125614/GRK 2220. We wish to thank Andrea  
899 Vitali who suggested the A.I.-powered modeling engine Eureka for equation discovery.

## 900 **Contributions**

901           **V.V.** performed the experiments; wrote the manuscript; analyzed the data;  
902 performed mathematical and bioinformatic simulations; developed software and designed  
903 the experiments. **R.H.** performed exploratory data analyses; processed DNA samples. **F.C.**  
904 conceived and designed the project; supervised; wrote the manuscript; and secured  
905 funding.

## 906 **Competing Interests**

907           The Authors declare no competing interests.

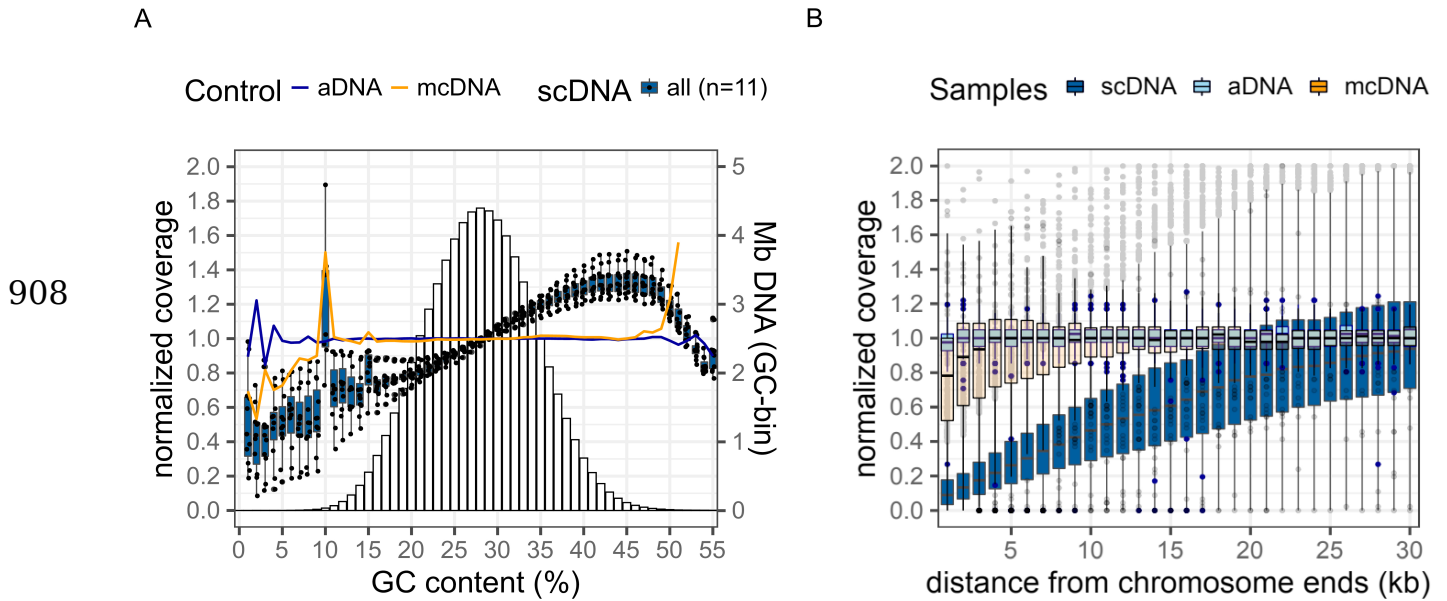

909 **Figure 1. Amplification biases of MDA-based single-cell DNA seq. A) Positive GC**  
910 **bias.** Change in normalized base coverage with GC content (%). Normalized coverage =  
911  $n^\circ$  reads / base / mean coverage. Bar chart in the background shows the amount of DNA  
912 for each GC bin (Megabases, Mb, secondary axis). **B) Terminal representation bias.**  
913 Change in normalized base coverage with distance from chromosome termini (kilobases,  
914 kb). The degree of GC bias and underrepresentation of scaffold ends are shown for 11  
915 single-cell sequencing samples (scDNA), their parental mass culture sample (mcDNA) and  
916 one artificially generated sample (aDNA). MDA, Multiple Displacement Amplification.  
917 scDNA, single-cell DNA sequencing. mcDNA, mass culture DNA sequencing. aDNA,  
918 artificial DNA sequencing.



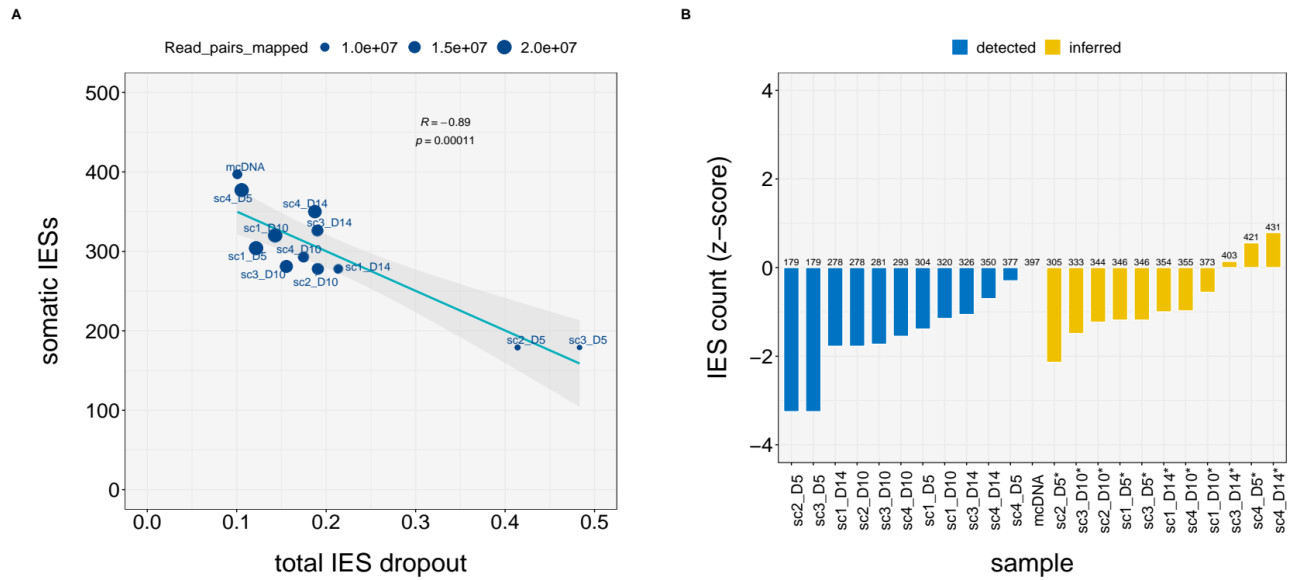

919

920 **Figure 2. IES dropout due to uneven genome representation in scDNA samples. A)**

921 **Number of detected somatic IESs as a function of coverage.** Number of somatic

922 mutations detected as a function of Total IES dropout (“invisible” IES loci) and number of

923 read pairs mapped (dot size). Somatic IESs ~ Total IES dropout,  $r = 0.882$ ,  $P < 0.01$ . **B)**

924 **Count of somatic IESs before and after correction.** Somatic IES counts before and

925 after correcting for Total IES dropout. Deviation is relative to the count obtained for bulk

926 DNA-seq (mcDNA; z-score = 0). Correction, count / (1 – Total IES dropout). Deviation from

927 mcDNA count, IES count z-score = (IES\_count – ref\_value) / sd. Counts and corrected

928 counts are indicated above bars. Sample names for corrected counts are labeled with a

929 star sign.

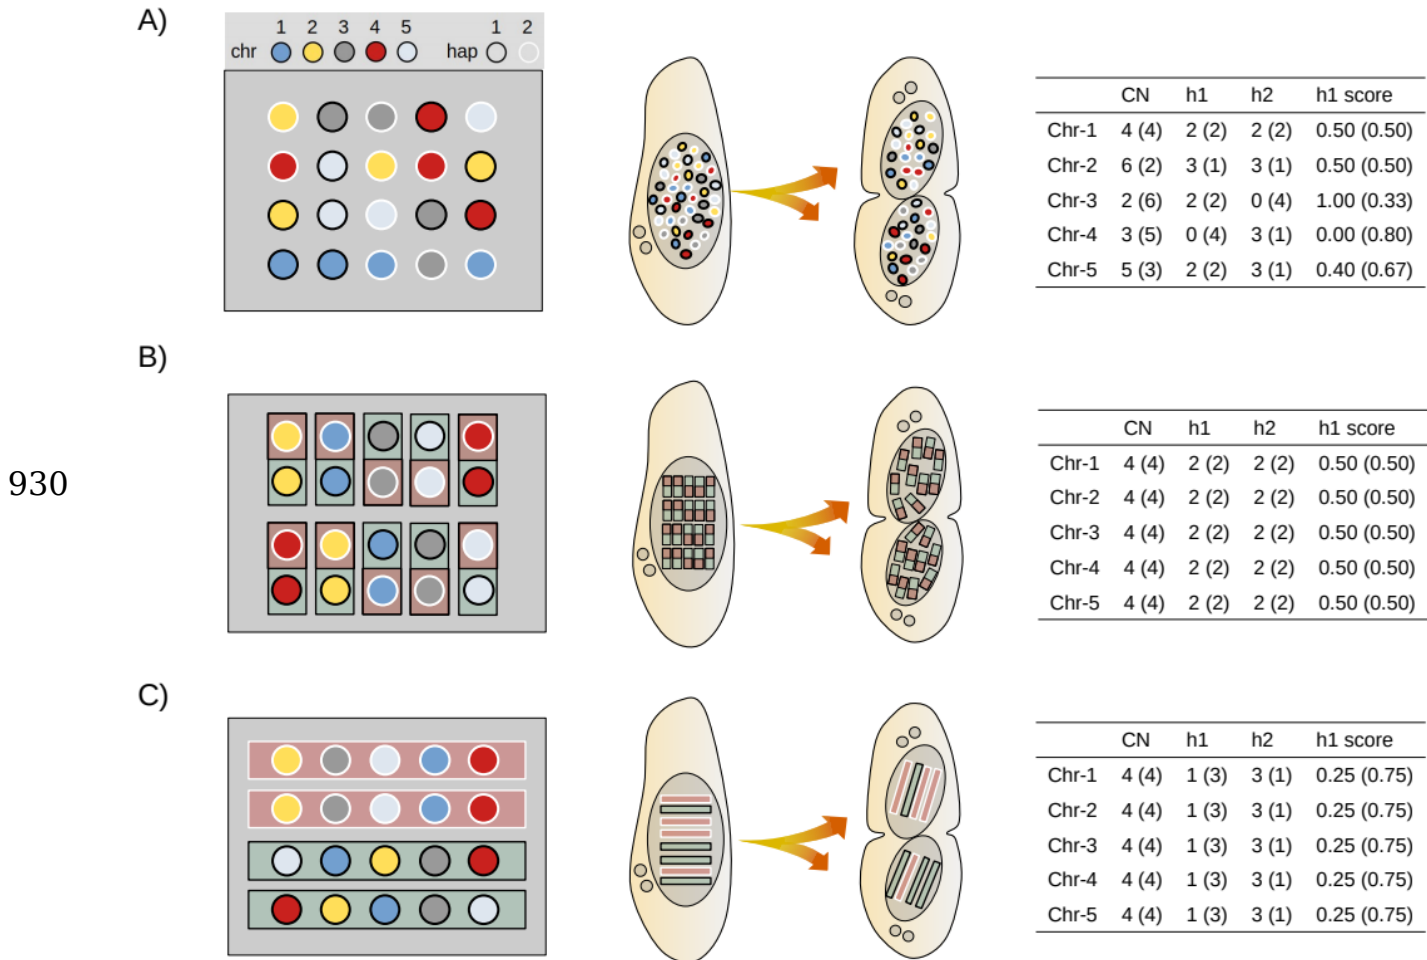

931 **Figure 3. Models of macronuclear architecture in ciliates.** Models for a hypothetical  
 932 tetraploid cell with 5 somatic chromosome types (Chr) generated by conjugation (ex-  
 933 conjugant). **Left.** Configuration of macronuclear sub-units in G1 (prior to DNA replication).  
 934 **Center.** Random segregation of sub-units during amitotic division. **Right.** Copy number  
 935 variation of individual chromosomes and their haplotypes after a single cell division. **A)**  
 936 *Chromosomal model.* Individual somatic chromosomes segregate freely.  $N = 2 * Chr * k$ ,  
 937 where N is the total number of segregating sub-units at cell division and k is the ploidy  
 938 level. **B) Diploid subunit model.** Homologous chromosomes are bundled up into diploid  
 939 sub-units.  $N = Chr * k$ . **C) Whole-genome haploid subunit model.** Full sets of chromosomes  
 940 are bundled into single haploid sub-units. Each sub-unit contains a full complement of  
 941 chromosomal variants from either one of the parental haplotypes (but not both).  $N = 2 * k$ .

942 CN, Copy Number.  $h_1$ , CN of haplotype 1.  $h_2$ , CN of haplotype 2.  $h_1$  score, nuclear  
943 prevalence of haplotype 1.  $h_1 = h_1 / (h_1 + h_2)$ . Before cell division,  $CN = k$  and  $h_1 = h_2 =$   
944 0.50 for each chromosome type. Each daughter cell receives exactly half of the sub-units  
945 ( $N / 2$ ) at cell division (number of sub-units in G1). All chromosomes are depicted as  
946 heterozygous for illustration purpose only.

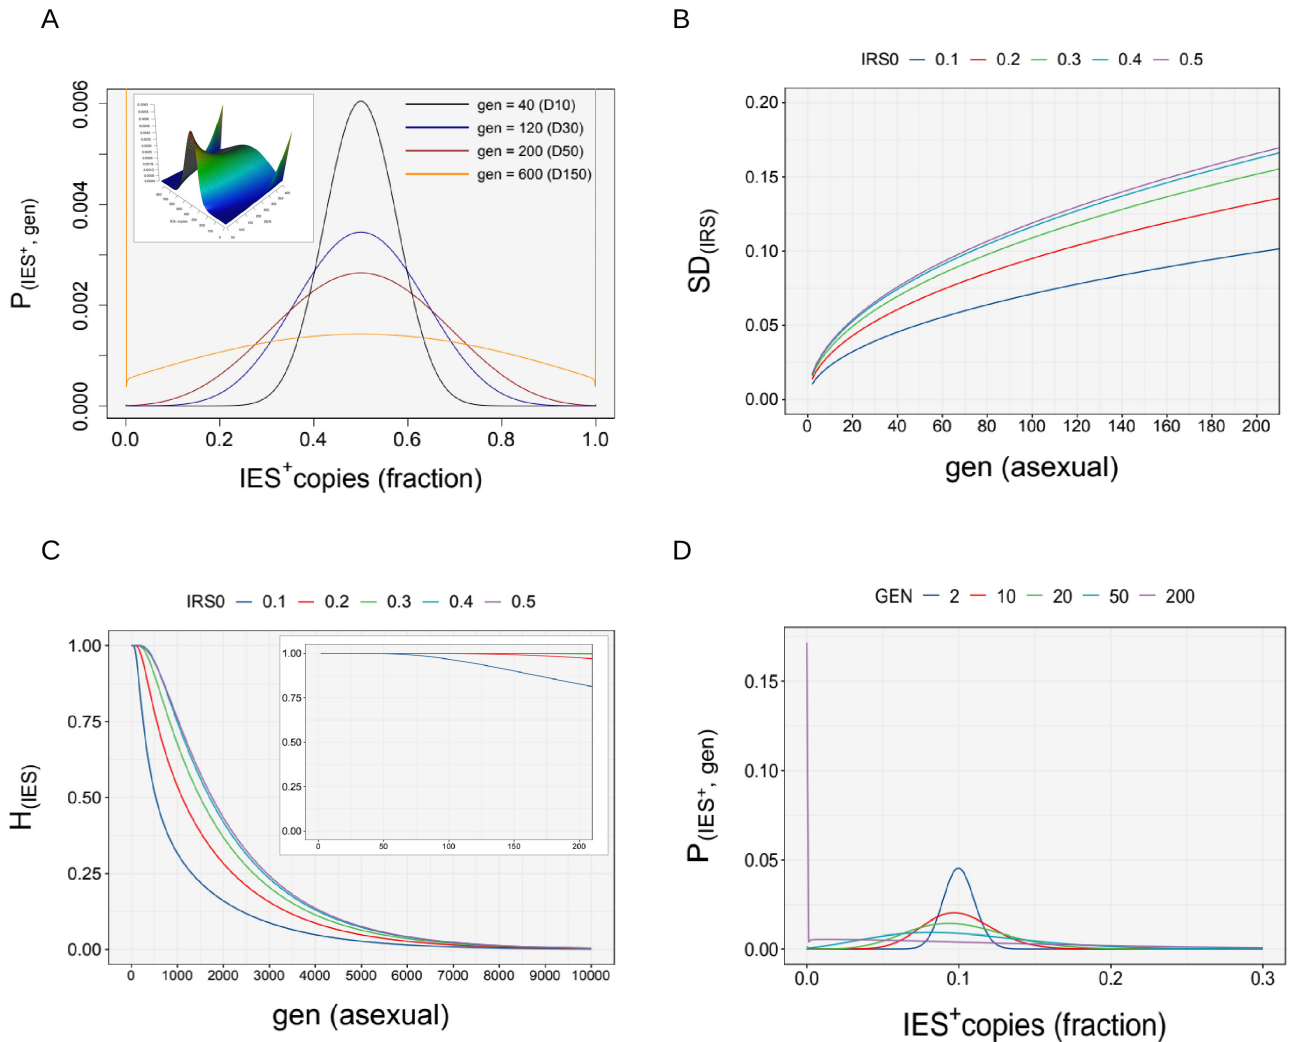

947

948 **Figure 4. Somatic assortment in *P. tetraurelia*.** **A)** Probability distribution of IES<sup>+</sup> copies,  
 949  $P(IES^+; GEN)$ . Simulated probability distribution of the number of IES<sup>+</sup> copies in the  
 950 somatic nuclei after successive amitotic divisions ( $GEN = 40, 120, 200, 600$ ). Cultivation  
 951 days (D) are indicated in brackets. The number of IES<sup>+</sup> copies is expressed as a fraction  
 952 of the ploidy ( $k = 860$ ). Simulation is shown for  $IRS_0 = 0.5$ . The inset shows the probability  
 953 surface across generations. **B)** Effect of assortment on standard deviation,  $\sigma(IRS_0; GEN)$ .  
 954 Variability of the number of IES<sup>+</sup> copies due to somatic assortment. The rate of somatic  
 955 assortment ( $d\sigma/dt$ ) is the fastest at  $IRS_0 = 0.5$ , and decreases symmetrically around this  
 956 value. **C)** Loss of heterozygosity,  $H$ . Probability of a locus to be in the heterozygous state  
 957 across divisions. The inset shows the loss of  $H$  for an IES locus across a full clonal cycle of

958 *P. tetraurelia* (lifespan of ~200 divisions). **D)** Probability distribution of IES<sup>+</sup> copies, P(IES<sup>+</sup>;  
959 GEN) across amitotic divisions (GEN = 2, 10, 20, 50, 200). Simulation is shown for IRS<sub>0</sub> =  
960 0.1. For all plots calculations are according to the haploid model. IRS<sub>0</sub>, starting retention  
961 levels. GEN, asexual generations. In b and c simulated values are identical for IRS<sub>0</sub> = [0.1  
962 | 0.9; 0.2 | 0.8; 0.3 | 0.7; 0.4 | 0.6].

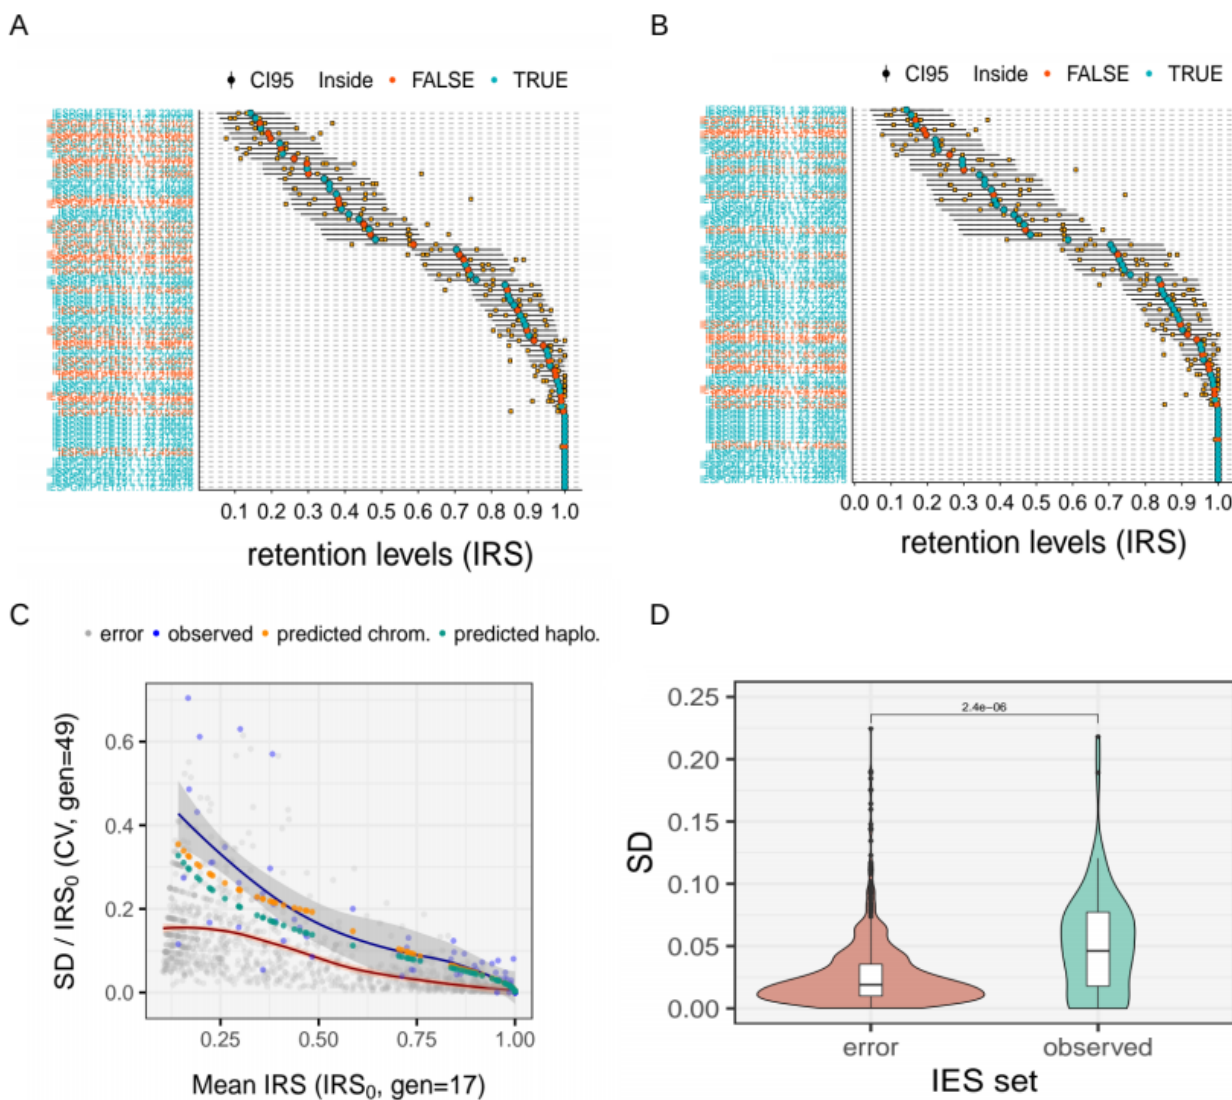

963

964 **Figure 5. Comparison of observed and theoretical variation of IES retention levels**  
 965 **~50 amitotic divisions post self-fertilization. A) Haploid model.** The empirical  
 966 distribution of IES retention levels is compared to the theoretical distribution predicted by  
 967 the haploid model (random assortment of haploid whole-genome subunits). **B)**  
 968 **Chromosomal model.** The empirical distribution of IES retention levels is compared to the  
 969 theoretical distribution predicted by the chromosomal model (random assortment of  
 970 chromosomes). Retention levels (orange filled-squares) were measured experimentally  
 971 with scDNA sequencing 14 days post autogamy (D14,  $n=3$ ) for a selected set of highly  
 972 covered ( $> 20$  reads) somatic loci (track set,  $n=75$ ). Horizontal black bars represents the

973 theoretical 95% Confidence Interval (CI) constructed on the mean retention levels ( $IRS_0$ ,  
974 large red or green filled-circles) measured 5 days post autogamy (D5,  $n=4$ ), ~31 asexual  
975 generations prior. Filled-circles ( $IRS_0$ ) are colored in green when the experimentally  
976 determined retention level lies inside the 95% CI for all three replicates and red otherwise.  
977 IRS, IES Retention Score. **C) Observed relative variation of IRSs 14 days post self-**  
978 **fertilization.** For each IES, the coefficient of variation of the IRSs measured on day 14  
979 ( $SD_{IRS} / IRS_0$ , gen = 49) is plotted against the mean IRSs measured on day 5 ( $IRS_0$ , gen =  
980 17).  $N = 75$ . Predicted IRSs are shown in yellow and green for the *chromosomal* and the  
981 *haploid* model simulation, respectively. The distribution of IRS errors (as in **Additional File**  
982 **1: Figure S5**) is shown for reference (gray circles). Local polynomial regression is shown  
983 in red and blue for the error and the empirical distribution, respectively. **D) Comparison of**  
984 **measurement errors with observed IRSs.** The absolute random error ( $SD_{bIRS}$ ) on IRS  
985 estimates ( $N = 1,196$ ) is compared to the observed variability of IRSs ( $SD_{IRS}$ ) measured 14  
986 days post self-fertilization (gen = 49,  $N = 75$ ). Distributions were compared with a Wilcoxon  
987 rank sum test. Pairwise comparisons and  $P$  value is shown above the plot.

988 **Table 1. Quantitative analysis of genome representation. GC Bias.** Linear regression of normalized coverage on GC  
 989 content. GC bias estimates are expressed as change of normalized coverage every 10% change in GC content. Normalized  
 990 coverage is shown for DNA with GC content one standard deviation (sd) above (~22%) and below (~34%) the mean (28%  
 991 GC). Perc., percentile. *b*, regression coefficient. **Terminal Bias.** Linear regression of normalized coverage on distance from  
 992 chromosome ends (every 10kb). True relationship is parabolic. Normalized coverage is estimated for regions that are 1 and  
 993 30 kb away from either chromosome ends. Terminal Bias was calculated on the 115- telomere-capped chromosomes of *P.*  
 994 *tetraurelia*. aDNA-seq, artificially-generated DNA sequencing. mcDNA-seq, mass culture DNA sequencing. scDNA-seq,  
 995 single-cell DNA sequencing. Mean  $\pm$  sd of the mean is shown for 11 scDNA-seq samples.

| Sample       | GC Bias           |                        |                        | Terminal Bias     |                   |                   |
|--------------|-------------------|------------------------|------------------------|-------------------|-------------------|-------------------|
|              | <i>b</i>          | Coverage               |                        | <i>b</i>          | Coverage          |                   |
|              |                   | 16th perc. (22%<br>GC) | 84th perc. (34%<br>GC) |                   | 1kb away          | 30kb away         |
| <b>aDNA</b>  | 0.001             | 0.999                  | 1.000                  | 0.006             | 0.981             | 1.007             |
| <b>mcDNA</b> | -0.009            | 0.985                  | 1.010                  | 0.059             | 0.830             | 1.000             |
| <b>scDNA</b> | 0.163 $\pm$ 0.059 | 0.811 $\pm$ 0.043      | 1.160 $\pm$ 0.036      | 0.321 $\pm$ 0.025 | 0.140 $\pm$ 0.024 | 1.037 $\pm$ 0.029 |

996



997 **Table 2. Quantitative analysis of IES dropout. Total dropout.** Fraction of all known IES loci ( $n=44,928$ ) with read  
 998 coverage equal to or lower than 20. **Terminal dropout.** Fraction of all known IES loci located within 30 kb from either  
 999 scaffold ends ( $n=9,986$ ) with a read coverage equal to or lower than 20. **GC dropout.** IES dropout unexplained by either  
 1000 terminal or residual dropout is assumed to results from the positive GC Bias. **Residual dropout.** IES dropout unrelated to  
 1001 amplification biases found in the mcDNA sample. Mapped pairs, total number of read pairs mapped (in millions). mcDNA,  
 1002 mass culture DNA sequencing. scDNA, single-cell DNA sequencing. scDNA\_1x, scDNA samples with approximately the  
 1003 same number of mapped reads compared to the mcDNA sample ( $5 \times 10^6 < n^\circ \text{ mapped reads} < 15 \times 10^6$ ,  $n=6$ ). scDNA\_2x,  
 1004 scDNA samples with approximately twice as many mapped reads compared to the mcDNA sample ( $n^\circ \text{ mapped reads} >$   
 1005  $19 \times 10^6$ ,  $n=4$ ). Mapped, mapped read pairs (Millions).

| Sample   | Mapped (M)   | IES dropout |             |             |              |
|----------|--------------|-------------|-------------|-------------|--------------|
|          |              | Total       | Terminal    | GC          | Residual     |
| mcDNA    | 10.92        | 0.10        | 0.05        | 0.00        | 0.06         |
| scDNA_1x | 11.29 ± 3.62 | 0.28 ± 0.14 | 0.11 ± 0.02 | 0.11 ± 0.09 | 0.06 ± 0.02  |
| scDNA_2x | 19.67 ± 0.51 | 0.12 ± 0.02 | 0.08 ± 0.01 | 0.02 ± 0.01 | 0.03 ± 0.001 |

1006
